# Supplementary material for: The synthesis of the heterocubane cluster [{CpMn}4(μ3-P)4] as a tetrahedral shaped starting material for the formation of polymeric coordination compounds
Source: Royal Society of Chemistry journal article supplement (doi:10.1039/c5cc04800a), 2015-01-01
Supplement: c5cc04800a1.pdf [file c5cc04800a1.pdf]

**Supporting Information for:**

**Synthesis of the heterocubane cluster [ $\{\text{CpMn}\}_4(\mu_3\text{-P})_4$ ] as a tetrahedral shaped starting material for the formation of polymeric coordination compounds**

**Sebastian Heine<sup>a</sup>, Konrad Kiefer<sup>b</sup>, Gábor Balázs,<sup>a</sup> Claudia Wickleder<sup>b</sup> and Manfred Scheer<sup>\*a</sup>**

*a) Institute of Inorganic Chemistry, University of Regensburg, 93040 Regensburg, Germany.  
Fax: +49 941943 4439; Tel: +49 941943 4440; E-mail: manfred.scheer@chemie.uni-regensburg.de*

*b) Inorganic Chemistry, Department of Chemistry/Biology, 57068 Siegen, Germany.*

**Contents**

- 1) Experimental Part**
- 2) NMR Investigations**
- 3) Crystallographic Details**
- 4) Computational Details**
- 5) Calculation of Core Volumes**

## 1) Experimental Part

All experiments were carried out under an atmosphere of dry argon or nitrogen using glovebox and schlenk techniques. Solvents were purified, dried and degassed prior to use. P<sub>4</sub>, CuCl and CuBr were available, [CpMn(cht)]<sup>[1]</sup> and [CpMn(CO)<sub>2</sub>(thf)]<sup>[2]</sup> were prepared according to literature procedures. The NMR spectra were measured on a Bruker Avance 300, 400 or 600 spectrometer. EI-MS spectra were measured on a Finnigan MAT SSQ 710A mass spectrometer and FD-MS spectra on a Finnigan MAT 95 mass spectrometer. The elemental analyses were determined on a Vario EL III apparatus. Photoluminescence emission and excitation measurements were performed using a Fluorolog3 spectrofluorometer (Jobin Yvon). Emission was detected starting from 400 nm down to 1600 nm. A liquid helium closed-cycle cryostat was used for measurements at 10 K. Reflection spectra at room temperature were recorded with the aid of a Cary 5000 (Varian) from 200 to 2500 nm.

### Synthesis of [Cp<sub>4</sub>Mn<sub>4</sub>P<sub>4</sub>] (1):

[CpMn(cht)] (0.93 g, 4.4 mmol) and P<sub>4</sub> (1.8 g, 14.5 mmol) are dissolved 50 mL 1,3-diisopropylbenzene and refluxed for 20 min. The solution becomes dark brown and sometimes a metal mirror is observed. The solvent and unreacted P<sub>4</sub> are removed in vacuum at 60 °C. The residue is triturated with 25 mL CH<sub>2</sub>Cl<sub>2</sub> and filtered through Celite. This is repeated with a further portion of 10 mL CH<sub>2</sub>Cl<sub>2</sub>. The collected filtrates are condensed to 15 mL and cooled to -35 °C. The obtained crystals are decanted and dried in vacuum. Another portion of crystals is obtained from the mother liquor (485 mg, 73%).

**1:** [C<sub>20</sub>H<sub>20</sub>Mn<sub>4</sub>P<sub>4</sub>] calc.: C, 39.77; H, 3.34. found: C, 39.48; H, 3.49. ESI-MS (CH<sub>2</sub>Cl<sub>2</sub>): *m/z* (%) = 603.9 (51%, [M]<sup>+</sup>), 422.0 (78%, [Cp<sub>3</sub>Mn<sub>3</sub>P<sub>2</sub>]<sup>+</sup>), 185.1 (48%, [Cp<sub>2</sub>Mn]<sup>+</sup>), 66.1 (100%, [CpH]<sup>+</sup>). <sup>1</sup>H NMR (CD<sub>2</sub>Cl<sub>2</sub>): δ [ppm] = 4.58 (s, C<sub>5</sub>H<sub>5</sub>). <sup>31</sup>P{<sup>1</sup>H} NMR (CD<sub>2</sub>Cl<sub>2</sub>): δ [ppm] = 1079.8 (s, ω<sub>1/2</sub> = 31 Hz, P). <sup>13</sup>C{<sup>1</sup>H} NMR (CD<sub>2</sub>Cl<sub>2</sub>): δ [ppm] = 82.7 (C<sub>5</sub>H<sub>5</sub>).

### Synthesis of [{Cp<sub>4</sub>Mn<sub>4</sub>P<sub>4</sub>}{CuX}]<sub>n</sub> (2-Cl: X = Cl; 2-Br: X = Br):

A solution of CuX (83 μmol) in 10 mL CH<sub>3</sub>CN is layered over a solution of [Cp<sub>4</sub>Mn<sub>4</sub>P<sub>4</sub>] (50 mg, 83 μmol) in 10 mL CH<sub>2</sub>Cl<sub>2</sub>. After complete diffusion, black crystals of **2-Cl** and **2-Br**, respectively, and an off-white powder is obtained. The heterogeneous mixture is shaken carefully, the crystals are allowed to settle down and the mother liquor suspension is decanted via cannula. The crystals are washed twice with 15 mL CH<sub>3</sub>CN in the same manner as before and dried in vacuum. The collected liquids are filtrated, washed with 15 mL CH<sub>3</sub>CN three-times and dried in vacuum.

**2-Cl:** Crystalline yield of **2-Cl**: 42 mg (72%); Yield (Powder): 5 mg.

[C<sub>20</sub>H<sub>20</sub>Mn<sub>4</sub>P<sub>4</sub>CuCl] calc.: C, 34.17; H, 2.87. found: C, 39.94; H, 2.92. Powder found: C, 24.64; H, 2.55; N, 2.25.

**2-Br:** Crystalline yield of **2-Br**: 11 mg (18%); Yield (Powder): 5 mg.

[C<sub>20</sub>H<sub>20</sub>Mn<sub>4</sub>P<sub>4</sub>CuBr] calc.: C, 32.14; H, 2.70. found: C, 31.86; H, 2.79. Powder found: C, 26.21; H, 2.77; N, traces.

**Synthesis of  $\{[(\text{CpMn})_4(\mu_3\text{-P})_4]\{\text{CpMn}(\text{CO})_2\}_n\}$  (**3a**:  $n = 1$ ; **3b**:  $n = 2$ ):**

A solution of  $[\text{CpMn}(\text{CO})_3]$  (2.04 g, 10 mmol) and cycloheptatriene (3.0 g, 3.4 mL, 32.6 mmol) in 150 mL 1,3-diisopropylbenzene is irradiated for 20 h (CO bands are not completely vanished). After  $\text{P}_4$  (3.72 g, 30 mmol) was added, the reaction mixture is refluxed for 60 min. The solvent and unreacted  $\text{P}_4$  are removed in vacuum at 60 °C. The residue is triturated with 25 mL  $\text{CH}_2\text{Cl}_2$  and filtered through Celite. This is repeated with a further portion of 10 mL  $\text{CH}_2\text{Cl}_2$ . A column chromatography (silica, 20x4 cm,  $\text{CH}_2\text{Cl}_2$ ) affords a small brown fraction of **3b**. With THF another brown band is collected which is composed of a 3:1 mixture of **3a** and **1**, as indicated by NMR spectroscopy and elemental analysis. An analytically pure sample of **3b** can be obtained from concentrated  $\text{CH}_2\text{Cl}_2$  solution. A crystalline mixture of **3a** and **1** is also obtained from concentrated  $\text{CH}_2\text{Cl}_2$  solution.

**3a** (as 3:1 mixture with **1**): Yield: 215 mg  $\rightarrow$  180 mg pure **3a** (9%).

$3[\text{C}_{27}\text{H}_{25}\text{Mn}_5\text{O}_2\text{P}_4] \cdot \mathbf{1}$  calc.: C, 40.79; H, 3.28. found: C, 41.22; H, 3.32. ESI-MS ( $\text{CH}_2\text{Cl}_2$ ):  $m/z$  (%) = 779.7 (12%,  $[\text{M}]^+$ ), 723.7 (9%,  $[\text{Cp}_5\text{Mn}_5\text{P}_4]^+$ ), 603.7 (61%,  $[\text{Cp}_4\text{Mn}_4\text{P}_4]^+$ ), 510.8 (30%,  $[\text{Cp}_4\text{Mn}_4\text{P}]^+$ ), 421.9 (100%,  $[\text{Cp}_3\text{Mn}_3\text{P}_2]^+$ ), 301.9 (16%,  $[\text{Cp}_2\text{Mn}_2\text{P}_2]^+$ ), 185.0 (91%,  $[\text{Cp}_2\text{Mn}]^+$ ), 120.0 (65%,  $[\text{CpMn}]^+$ ). IR ( $\text{CH}_2\text{Cl}_2$ ):  $\nu_{\text{CO}}$  [ $\text{cm}^{-1}$ ] = 1917 (s), 1858 (s).  $^1\text{H}$  NMR ( $\text{CD}_2\text{Cl}_2$ ):  $\delta$  [ppm] = 4.59 (s-br,  $\omega_{1/2}$  = 10 Hz, 5H,  $\text{C}_5\text{H}_5$ ), 4.62 (s-br,  $\omega_{1/2}$  = 5 Hz, 15H,  $\text{C}_5\text{H}_5$ ), 4.68 (d,  $^3J_{\text{PH}}$  = 1.3 Hz, 5H,  $\text{C}_5\text{H}_5$ ); 4.53 (s, 6.8H,  $\text{C}_5\text{H}_5$  from **1**).  $^{31}\text{P}\{^1\text{H}\}$  NMR ( $\text{CD}_2\text{Cl}_2$ ):  $\delta$  [ppm] = 915.0 (s, 1P), 1091.8 (s-br,  $\omega_{1/2}$  = 107 Hz, 3P); 1079.7 (s, 1P from **1**).  $^{13}\text{C}\{^1\text{H}\}$  NMR ( $\text{CD}_2\text{Cl}_2$ ):  $\delta$  [ppm] = 82.6 (s,  $\text{C}_5\text{H}_5$ , superimposed with signal of **1**) 83.1 (q,  $^3J_{\text{PC}}$  = 4 Hz,  $\text{C}_5\text{H}_5$ ), 85.3 (m,  $\text{C}_5\text{H}_5$ ), 234.8 (d,  $^2J_{\text{PC}}$  = 19 Hz, CO).

**3b**: Yield: 13 mg (<1%).

ESI-MS ( $\text{CH}_2\text{Cl}_2$ ):  $m/z$  (%) = 955.5 (10%,  $[\text{M}]^+$ ), 899.6 (2%,  $[\text{Cp}_6\text{Mn}_6\text{P}_4(\text{CO})_2]^+$ ), 779.6 (17%,  $[\text{Cp}_5\text{Mn}_5\text{P}_4(\text{CO})_2]^+$ ), 723.6 (5%,  $[\text{Cp}_5\text{Mn}_5\text{P}_4]^+$ ), 658.6 (10%,  $[\text{Cp}_4\text{Mn}_5\text{P}_4]^+$ ), 603.7 (33%,  $[\text{Cp}_4\text{Mn}_4\text{P}_4]^+$ ), 510.8 (71%,  $[\text{Cp}_4\text{Mn}_4\text{P}]^+$ ), 421.9 (16%,  $[\text{Cp}_3\text{Mn}_3\text{P}_2]^+$ ), 325.9 (21%,  $[\text{Cp}_2\text{Mn}_3\text{P}]^+$ ), 301.9 (19%,  $[\text{Cp}_2\text{Mn}_2\text{P}_2]^+$ ), 207.0 (44%,  $[\text{CpMn}(\text{CO})_2\text{P}]^+$ ), 185.0 (77%,  $[\text{Cp}_2\text{Mn}]^+$ ), 181.1 (48%,  $[\text{CpMnP}_2]^+$ ), 119.9 (83%,  $[\text{CpMn}]^+$ ). IR ( $\text{CH}_2\text{Cl}_2$ ):  $\nu_{\text{CO}}$  [ $\text{cm}^{-1}$ ] = 1917 (s), 1858 (s).  $^1\text{H}$  NMR ( $\text{CD}_2\text{Cl}_2$ ):  $\delta$  [ppm] = 4.77 (d,  $^3J_{\text{PH}}$  = 1.1 Hz, 10H,  $\text{C}_5\text{H}_5$ ), 4.81 (s-br,  $\omega_{1/2}$  = 11 Hz, 20H,  $\text{C}_5\text{H}_5$ ).  $^{31}\text{P}\{^1\text{H}\}$  NMR ( $\text{CD}_2\text{Cl}_2$ ):  $\delta$  [ppm] = 922 (s-br,  $\omega_{1/2}$   $\approx$  310 Hz, 1P),  $\delta$  925 (s-br,  $\omega_{1/2}$   $\approx$  730 Hz, 1P), 1100 (s-br,  $\omega_{1/2}$   $\approx$  560 Hz, 1P), 1105 (s-br,  $\omega_{1/2}$   $\approx$  420 Hz, 1P).  $^{13}\text{C}\{^1\text{H}\}$  NMR ( $\text{CD}_2\text{Cl}_2$ ):  $\delta$  [ppm] = 82.9 ( $\text{C}_5\text{H}_5$ ), 85.9 ( $\text{C}_5\text{H}_5$ ), 88.9 ( $\text{C}_5\text{H}_5$ ); CO signal is not observed. As expected, the  $^1\text{H}$  and  $^{13}\text{C}\{^1\text{H}\}$  NMR spectra show only one set of signals. However, the  $^{31}\text{P}\{^1\text{H}\}$  NMR show two sets of signals. This may likely be explained by two different rotamers.

**Synthesis of  $\{[(\text{CpMn})_4(\mu_3\text{-P})_4]\{\text{CpMn}(\text{CO})_2\}_n\}$  (**3c**:  $n = 3$ ; **3d**:  $n = 4$ ):**

According to literature procedure a solution of  $[\text{CpMn}(\text{CO})_2(\text{thf})]$  in 50 mL is prepared from  $[\text{CpMn}(\text{CO})_3]$  (200 mg, 0.99  $\mu\text{mol}$ ). The solution is added to a solution of  $[\text{Cp}_4\text{Mn}_4\text{P}_4]$  (100 mg, 0.16  $\mu\text{mol}$ ) in 10 mL THF. The mixture is dried under vacuum, the residue is dissolved in 15 mL toluene and refluxed for 3 h. The solvent is removed again and the residue is washed with hexane. A column

chromatography (silica, 15x4 cm, CH<sub>2</sub>Cl<sub>2</sub>) first affords a brown fraction of **3d** followed by another brown band of **3c**. Analytically pure samples can be obtained from concentrated CH<sub>2</sub>Cl<sub>2</sub> solutions.

**3c**: Yield: 51 mg (28%).

[C<sub>41</sub>H<sub>35</sub>Mn<sub>7</sub>O<sub>6</sub>P<sub>4</sub>] \* 1.5 CH<sub>2</sub>Cl<sub>2</sub> calc.: C, 40.53; H, 3.04. found: C, 41.08; H, 3.38. ESI-MS (CH<sub>2</sub>Cl<sub>2</sub>): *m/z* (%) = 1131.4 (< 1%, [M]<sup>+</sup>), 955.5 (4%, [Cp<sub>6</sub>Mn<sub>6</sub>P<sub>4</sub>(CO)<sub>4</sub>]<sup>+</sup>), 723.6 (5%, [Cp<sub>5</sub>Mn<sub>5</sub>P<sub>4</sub>]<sup>+</sup>), 421.8 (16%, [Cp<sub>3</sub>Mn<sub>3</sub>P<sub>2</sub>]<sup>+</sup>), 207.0 (100%, [CpMn(CO)<sub>2</sub>P]<sup>+</sup>), 185.0 (42%, [Cp<sub>2</sub>Mn]<sup>+</sup>), 119.9 (57%, [CpMn]<sup>+</sup>). IR (CH<sub>2</sub>Cl<sub>2</sub>): *v*<sub>CO</sub> [cm<sup>-1</sup>] = 1918 (s), 1860 (s). <sup>1</sup>H NMR (CD<sub>2</sub>Cl<sub>2</sub>): δ [ppm] = 4.75 (d, <sup>3</sup>*J*<sub>PH</sub> = 1.2 Hz, 15H, C<sub>5</sub>H<sub>5</sub>), 4.86 (q, <sup>3</sup>*J*<sub>PH</sub> = 1.6 Hz, 5H, C<sub>5</sub>H<sub>5</sub>), 4.91 (s-br, ω<sub>1/2</sub> = 9 Hz, 15H, C<sub>5</sub>H<sub>5</sub>). <sup>31</sup>P{<sup>1</sup>H} NMR (CD<sub>2</sub>Cl<sub>2</sub>): δ [ppm] = 932.1 (s-br, ω<sub>1/2</sub> = 288 Hz, 3P), 1103.5 (s-br, ω<sub>1/2</sub> = 348 Hz, 1P). <sup>13</sup>C{<sup>1</sup>H} NMR (CD<sub>2</sub>Cl<sub>2</sub>): δ [ppm] = 81.8 (C<sub>5</sub>H<sub>5</sub>); CO signal is not observed.

**3d**: Yield: 39 mg (19%).

[C<sub>48</sub>H<sub>40</sub>Mn<sub>8</sub>O<sub>8</sub>P<sub>4</sub>] calc.: C, 44.07; H, 3.08. found: C, 43.68; H, 3.38. ESI-MS (CH<sub>2</sub>Cl<sub>2</sub>): *m/z* (%) = 1308.3 (< 1%, [M]<sup>+</sup>), 1131.4 (< 1%, [M]<sup>+</sup>), 955.5 (2%, [Cp<sub>6</sub>Mn<sub>6</sub>P<sub>4</sub>(CO)<sub>4</sub>]<sup>+</sup>), 421.8 (8%, [Cp<sub>3</sub>Mn<sub>3</sub>P<sub>2</sub>]<sup>+</sup>), 207.0 (37%, [CpMn(CO)<sub>2</sub>P]<sup>+</sup>), 185.0 (86%, [Cp<sub>2</sub>Mn]<sup>+</sup>), 119.9 (100%, [CpMn]<sup>+</sup>). IR (CH<sub>2</sub>Cl<sub>2</sub>): *v*<sub>CO</sub> [cm<sup>-1</sup>] = 1921 (s), 1862 (s). <sup>1</sup>H NMR (CD<sub>2</sub>Cl<sub>2</sub>): δ [ppm] = 4.77 (d, <sup>3</sup>*J*<sub>PH</sub> = 1.1 Hz, 20H, C<sub>5</sub>H<sub>5</sub>), 5.0 (s-br, ω<sub>1/2</sub> = 13 Hz, 20H, C<sub>5</sub>H<sub>5</sub>). <sup>31</sup>P{<sup>1</sup>H} NMR (CD<sub>2</sub>Cl<sub>2</sub>): δ [ppm] = 940 (very broad, ω<sub>1/2</sub> ≈ 2000 Hz). <sup>13</sup>C{<sup>1</sup>H} NMR (CD<sub>2</sub>Cl<sub>2</sub>): δ [ppm] = 81.9 (C<sub>5</sub>H<sub>5</sub>), 82.2 (C<sub>5</sub>H<sub>5</sub>); CO signal is not observed.

## 2) NMR Investigations:

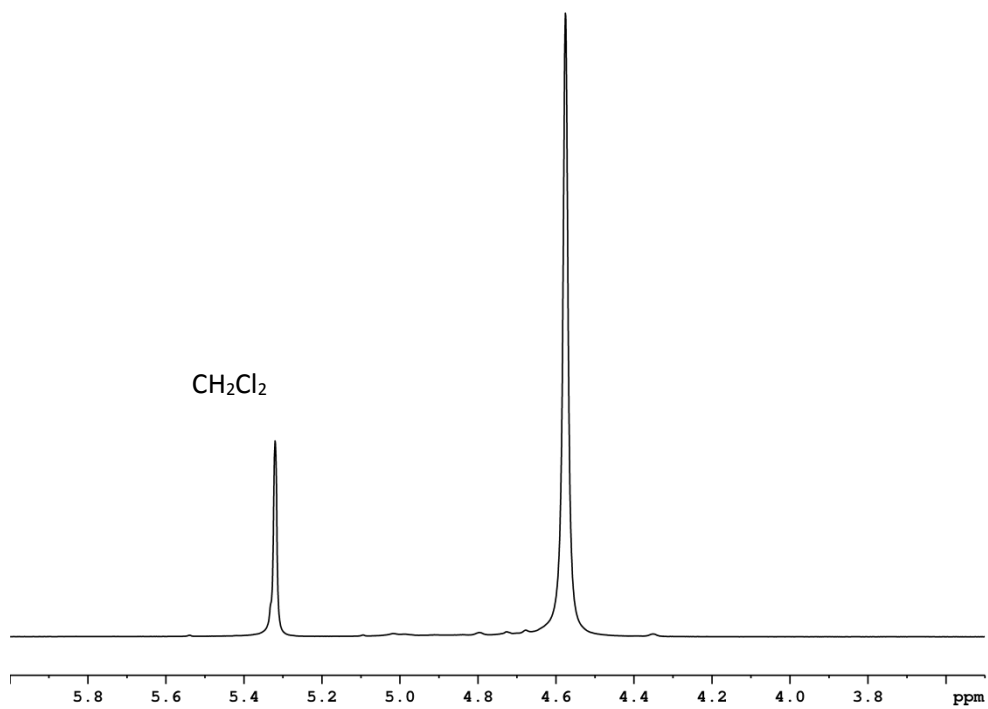

**Figure S1:**  $^1\text{H}$  NMR spectrum of **1** in  $\text{CD}_2\text{Cl}_2$  at 298 K.

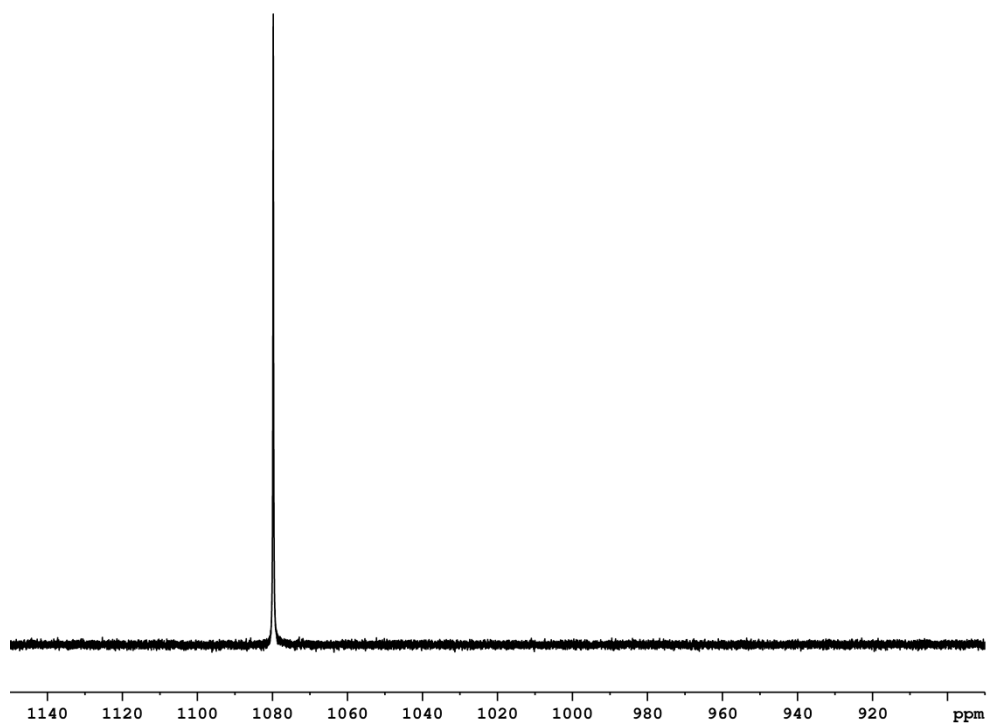

**Figure S2:**  $^{31}\text{P}\{^1\text{H}\}$  NMR spectrum of **1** in  $\text{CD}_2\text{Cl}_2$  at 298 K.

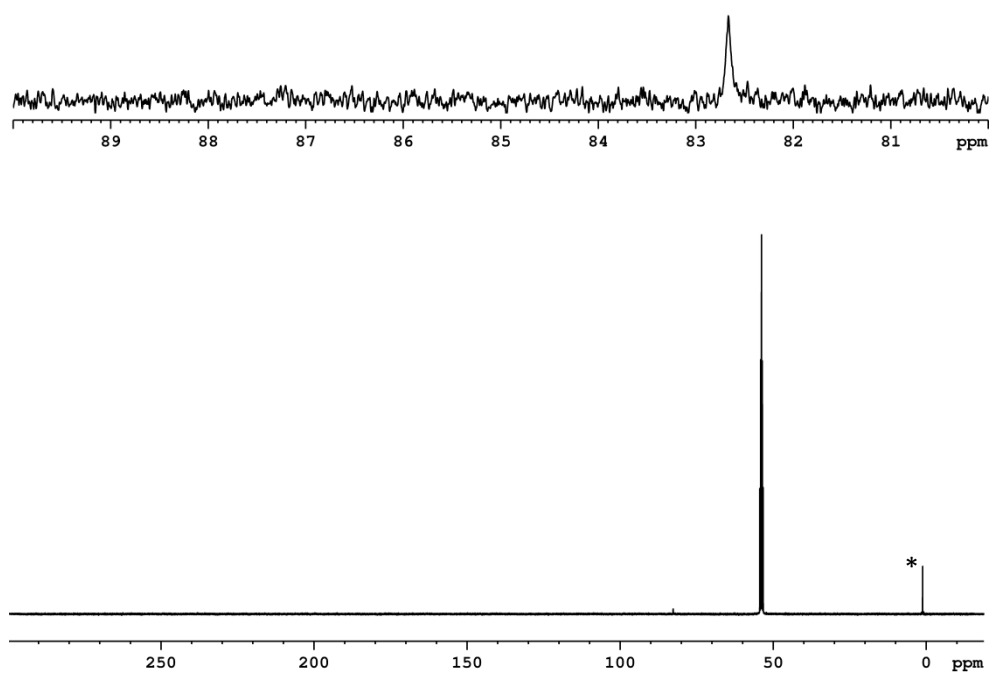

**Figure S3:**  $^{13}\text{C}\{^1\text{H}\}$  NMR spectrum of **1** in  $\text{CD}_2\text{Cl}_2$  at 298 K. Signal marked with an asterisk arises from silicon grease.

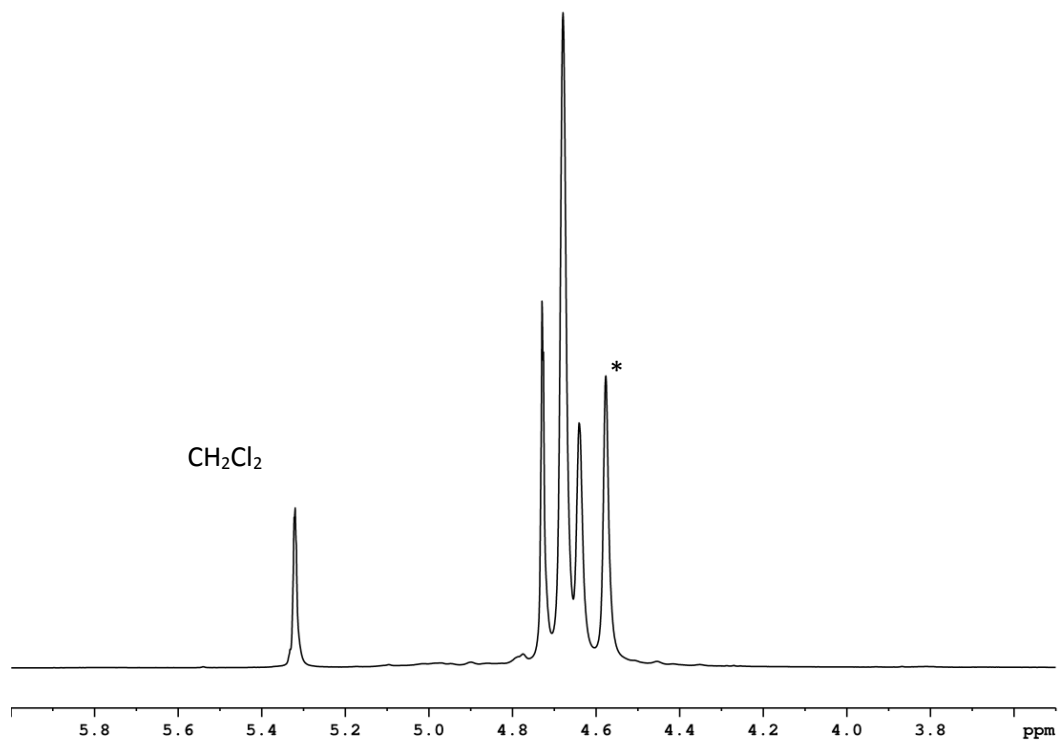

**Figure S4:**  $^1\text{H}$  NMR spectrum of **3a** in  $\text{CD}_2\text{Cl}_2$  at 298 K. Signal marked with an asterisk arises from impurities of **1**.

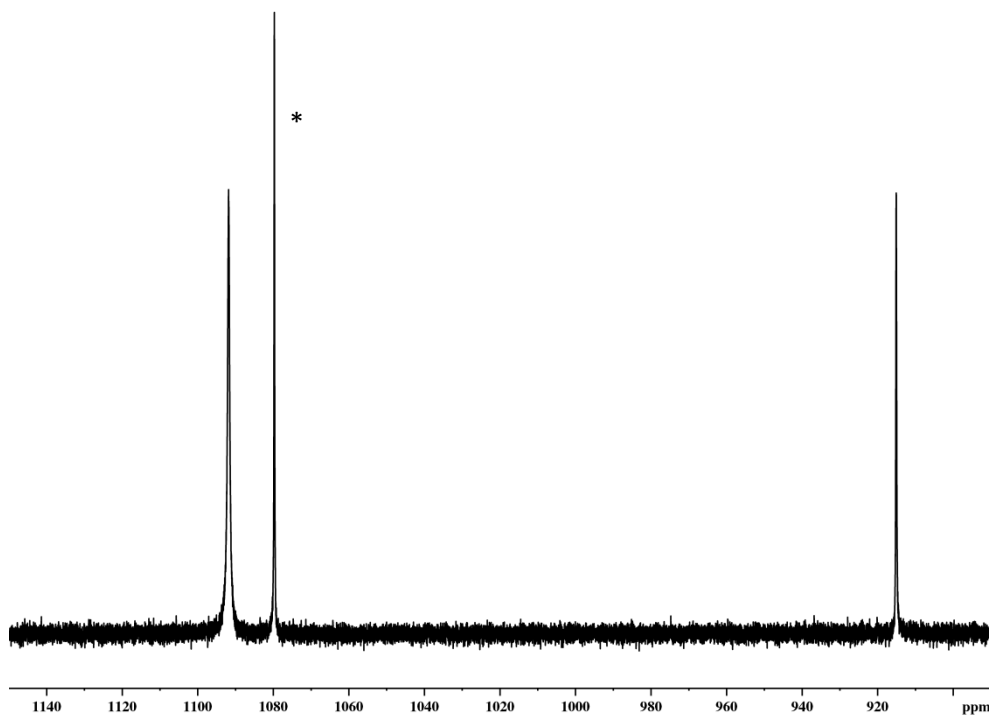

**Figure S5:**  $^{31}\text{P}\{^1\text{H}\}$  NMR spectrum of **3a** in  $\text{CD}_2\text{Cl}_2$  at 298 K. Signal marked with an asterisk arises from impurities of **1**.

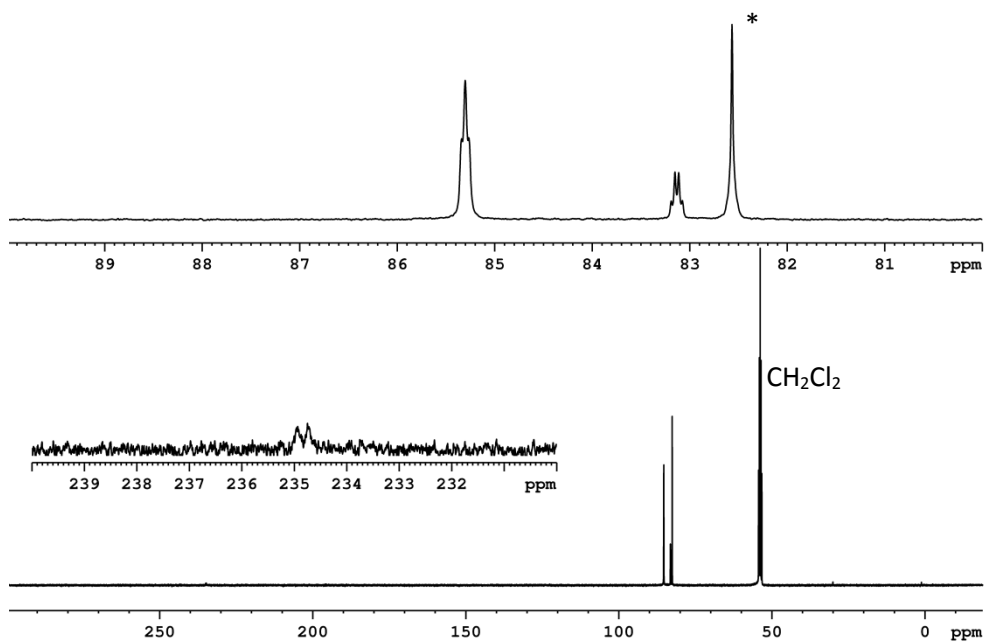

**Figure S6:**  $^{13}\text{C}\{^1\text{H}\}$  NMR spectrum of **3a** in  $\text{CD}_2\text{Cl}_2$  at 298 K. Signal marked with an asterisk is superimposed with signal of **1**.

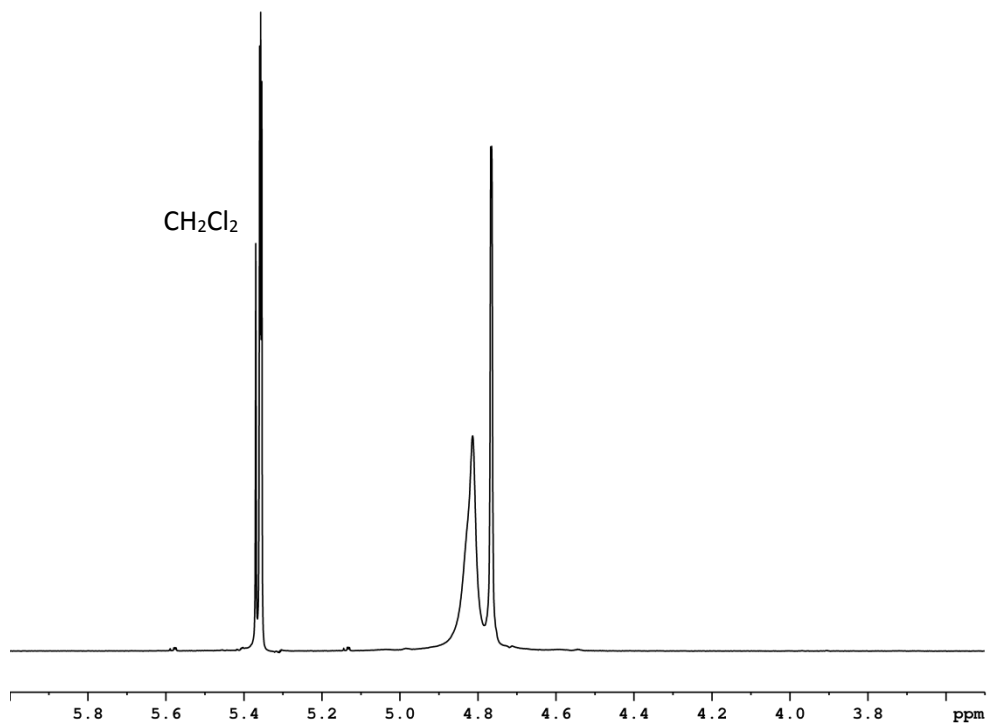

**Figure S7:**  $^1\text{H}$  NMR spectrum of **3b** in  $\text{CD}_2\text{Cl}_2$  at 298 K.

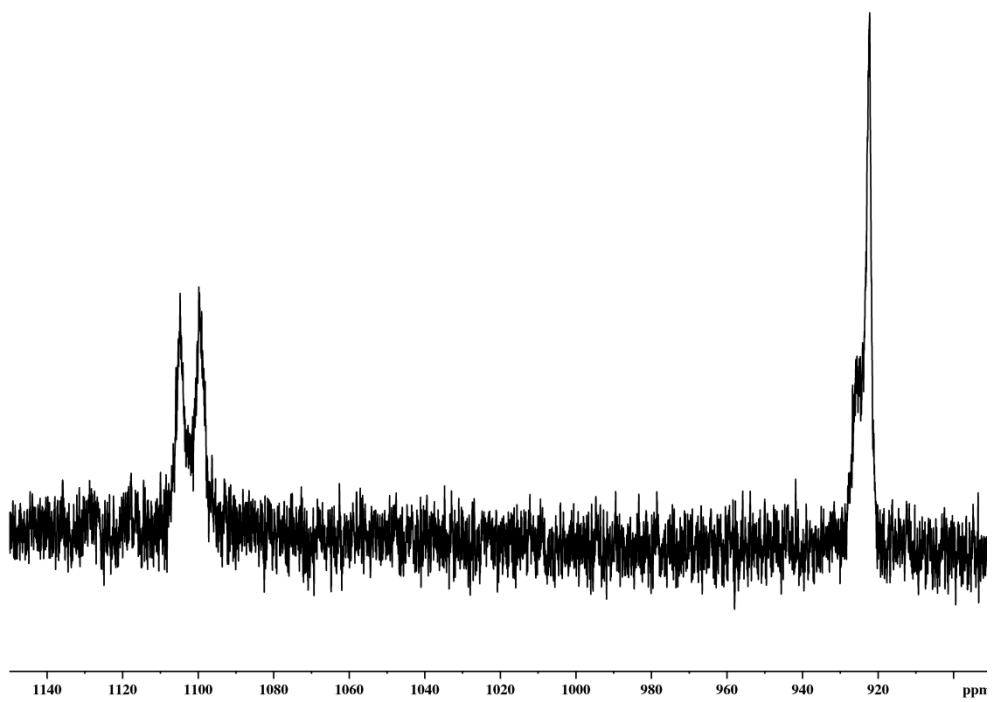

**Figure S8:**  $^{31}\text{P}\{^1\text{H}\}$  NMR spectrum of **3b** in  $\text{CD}_2\text{Cl}_2$  at 298 K.



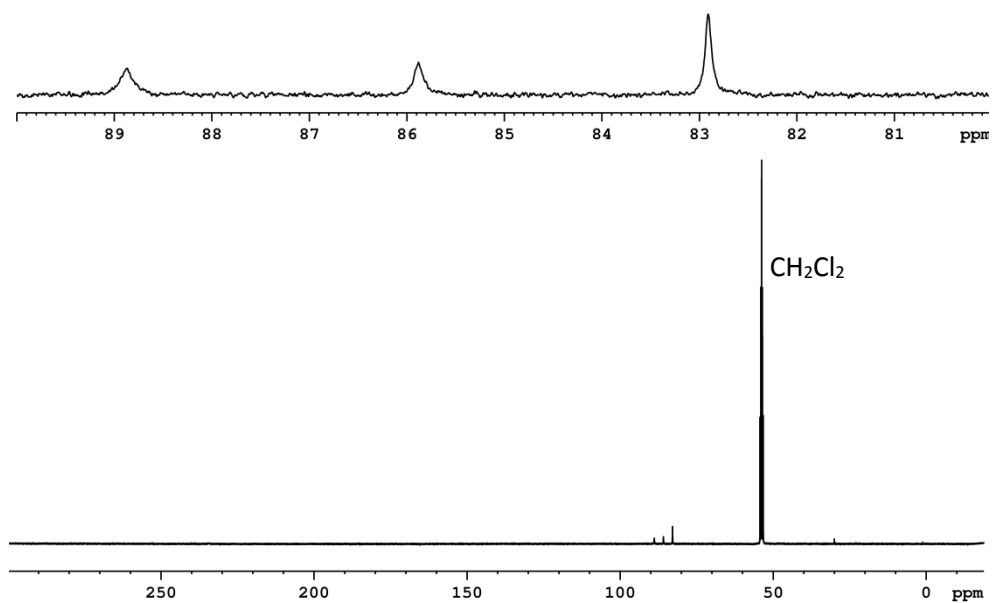

**Figure S9:**  $^{13}\text{C}\{^1\text{H}\}$  NMR spectrum of **3b** in  $\text{CD}_2\text{Cl}_2$  at 298 K.

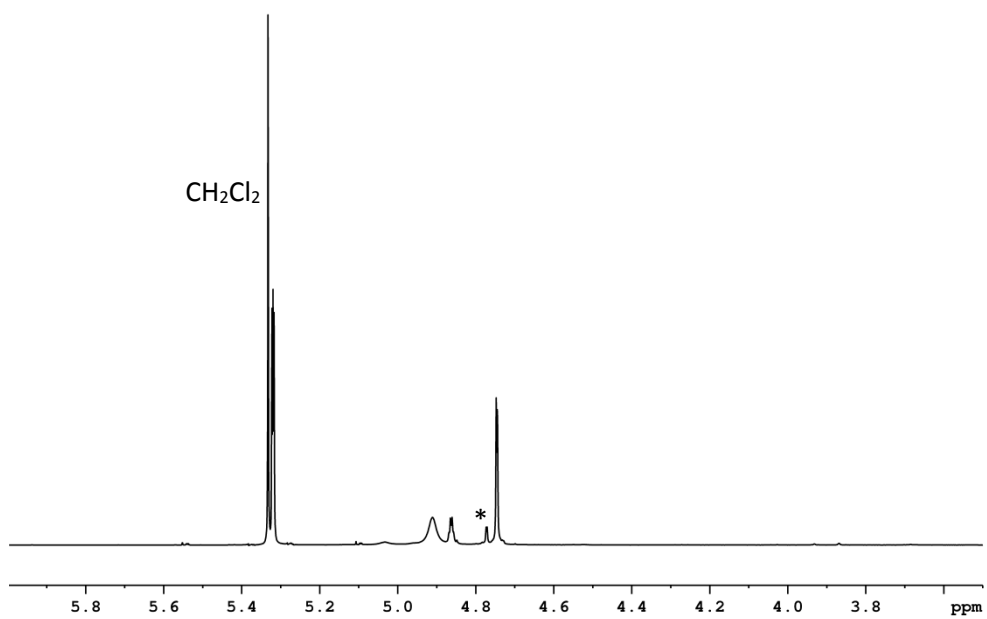

**Figure S10:**  $^1\text{H}$  NMR spectrum of **3c** in  $\text{CD}_2\text{Cl}_2$  at 298 K. Signal marked with an asterisk arises from impurities.

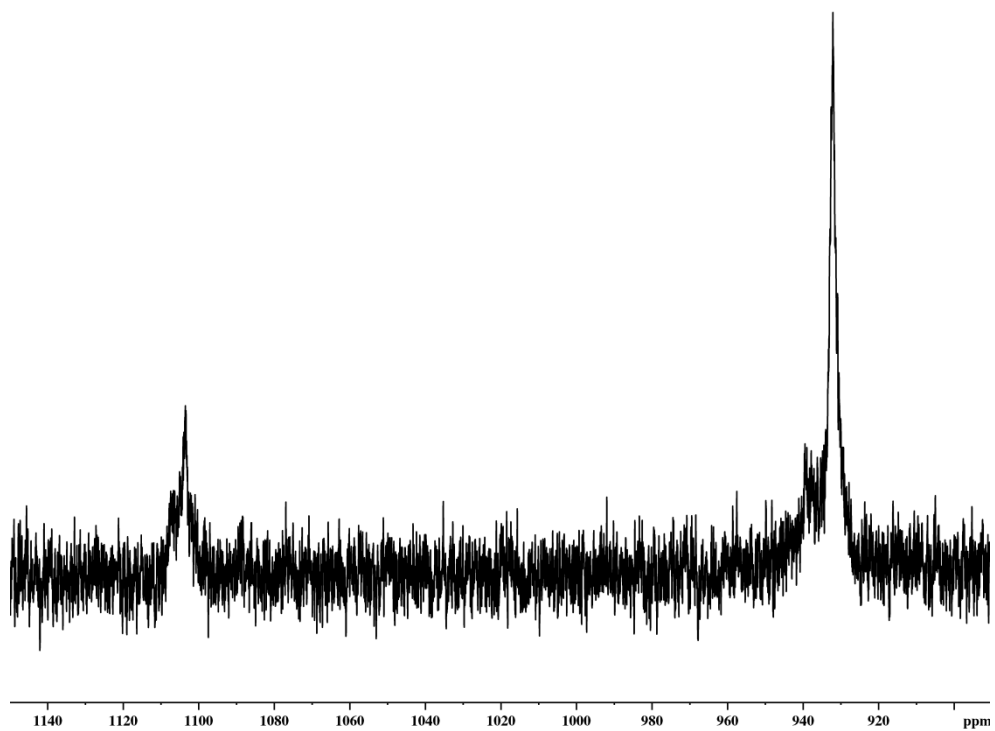

**Figure S11:**  $^{31}\text{P}\{^1\text{H}\}$  NMR spectrum of **3c** in  $\text{CD}_2\text{Cl}_2$  at 298 K.

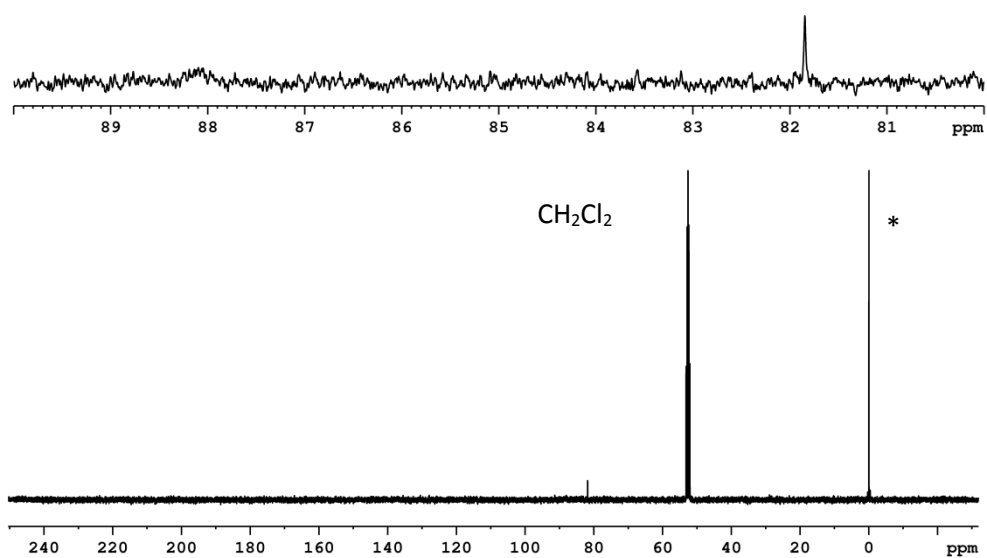

**Figure S12:**  $^{13}\text{C}\{^1\text{H}\}$  NMR spectrum of **3c** in  $\text{CD}_2\text{Cl}_2$  at 298 K. Signal marked with an asterisk arises from silicon grease.

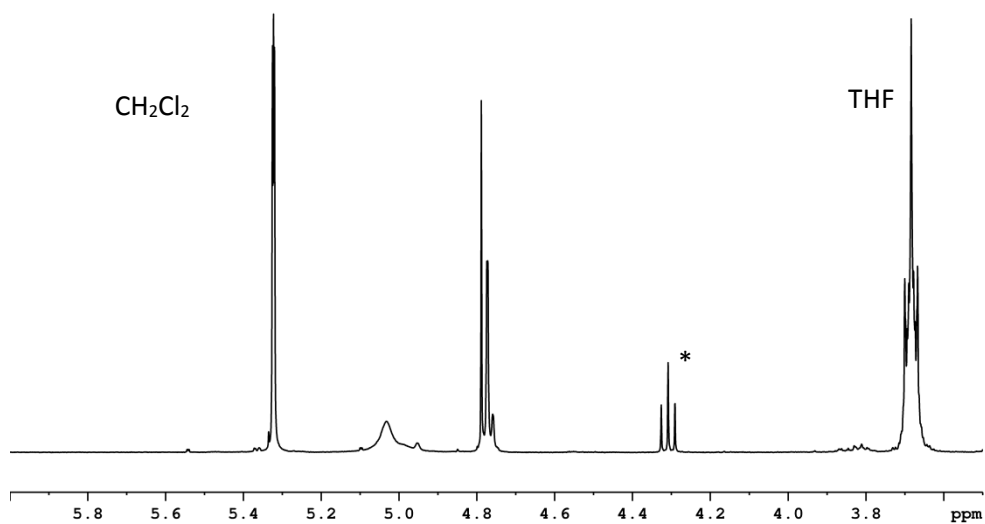

**Figure S13:**  $^1\text{H}$  NMR spectrum of **3d** in  $\text{CD}_2\text{Cl}_2$  at 298 K. Signal marked with an asterisk arises from impurities.

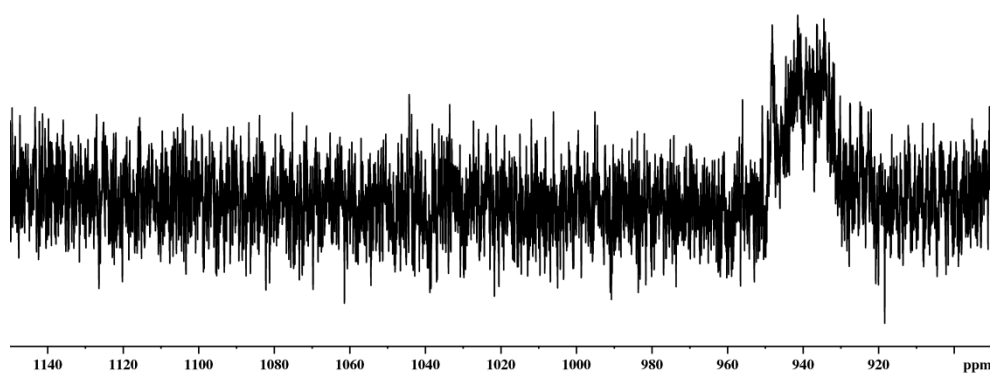

**Figure S14:**  $^{31}\text{P}\{^1\text{H}\}$  NMR spectrum of **3d** in  $\text{CD}_2\text{Cl}_2$  at 298 K.

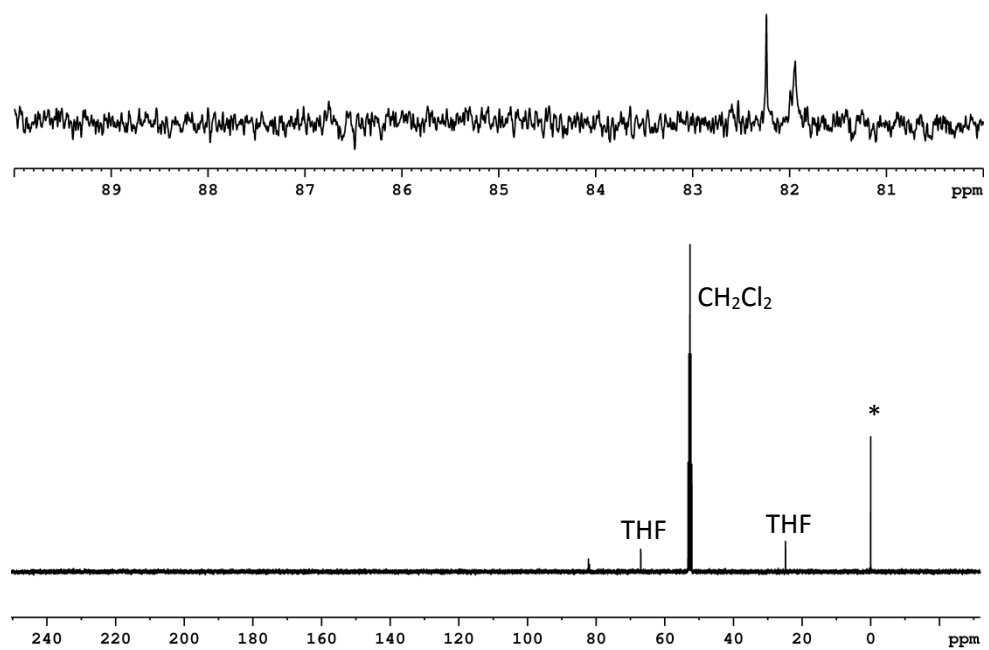

**Figure S15:**  $^{13}\text{C}\{^1\text{H}\}$  NMR spectrum of **3d** in  $\text{CD}_2\text{Cl}_2$  at 298 K. Signal marked with an asterisk arises from silicon grease.

### 3) Crystallographic Details:

The crystal structure analyses were performed on an Oxford Diffraction Gemini R Ultra CCD diffractometer (**1**, **2-Cl**, **2-Br**, **3a**) or an Oxford Diffraction SuperNova diffractometer (**3b**, **3c**, **3d**). For all compounds an analytical absorption correction was carried out.<sup>[3]</sup> The structures were solved by direct methods of the program SIR-92<sup>[4]</sup> and refined with least the square method on  $F^2$  employing SHELXL-97<sup>[5]</sup> with anisotropic displacements for non-H atoms. Hydrogen atoms were located in idealized positions and refined isotropically according to the riding model.

CCDC-10404879-1404885 contain the supplementary crystallographic data for this paper. These data can be obtained free of charge from the Cambridge Crystallographic Data Centre via [www.ccdc.cam.ac.uk/data\\_request/cif](http://www.ccdc.cam.ac.uk/data_request/cif).

|                                            | Crystal Data for <b>1</b> *CH <sub>2</sub> Cl <sub>2</sub>                     | Crystal Data for <b>2-Cl</b> *2CH <sub>2</sub> Cl <sub>2</sub>                   |
|--------------------------------------------|--------------------------------------------------------------------------------|----------------------------------------------------------------------------------|
| Empirical Formula                          | C <sub>21</sub> H <sub>22</sub> Cl <sub>2</sub> Mn <sub>4</sub> P <sub>4</sub> | C <sub>22</sub> H <sub>24</sub> Cl <sub>5</sub> CuMn <sub>4</sub> P <sub>4</sub> |
| Formula Weight                             | 688.93                                                                         | 872.85                                                                           |
| Temperature [K]                            | 123.0(6)                                                                       | 123.0(4)                                                                         |
| Crystal System                             | monoclinic                                                                     | monoclinic                                                                       |
| Space Group                                | <i>C2/c</i>                                                                    | <i>C2/c</i>                                                                      |
| <i>a</i> [Å]                               | 40.9164(6)                                                                     | 23.8316(6)                                                                       |
| <i>b</i> [Å]                               | 9.3302(1)                                                                      | 12.8659(3)                                                                       |
| <i>c</i> [Å]                               | 27.2353(4)                                                                     | 18.4127(4)                                                                       |
| $\alpha$ [°]                               | 90                                                                             | 90                                                                               |
| $\beta$ [°]                                | 116.922(2)                                                                     | 93.404(2)                                                                        |
| $\gamma$ [°]                               | 90                                                                             | 90                                                                               |
| Volume [Å <sup>3</sup> ]                   | 9270.5(3)                                                                      | 5635.7(2)                                                                        |
| <i>Z</i>                                   | 16                                                                             | 8                                                                                |
| $\rho_{\text{calc}}$ [mg/mm <sup>3</sup> ] | 1.974                                                                          | 2.057                                                                            |
| $\mu$ [mm <sup>-1</sup> ]                  | 22.144                                                                         | 21.660                                                                           |
| F(000)                                     | 5472.0                                                                         | 3440.0                                                                           |
| Crystal Size [mm <sup>3</sup> ]            | 0.5337 × 0.1091 × 0.0262                                                       | 0.2249 × 0.0817 × 0.0446                                                         |
| Radiation                                  | Cu-K $\alpha$ ( $\lambda$ = 1.54178)                                           | Cu-K $\alpha$ ( $\lambda$ = 1.54178)                                             |

|                                                       |                                                                     |                                                                     |
|-------------------------------------------------------|---------------------------------------------------------------------|---------------------------------------------------------------------|
| $2\theta$ Range                                       | 7.28 to 133.08°                                                     | 7.44 to 133.38°                                                     |
| Index Ranges                                          | -39 ≤ h ≤ 48<br>-9 ≤ k ≤ 10<br>-32 ≤ l ≤ 31                         | -26 ≤ h ≤ 28<br>-14 ≤ k ≤ 15<br>-21 ≤ l ≤ 16                        |
| Reflections Collected                                 | 25380                                                               | 18021                                                               |
| Independent Reflections                               | 8019<br>[ $R_{\text{int}} = 0.0490$ , $R_{\text{sigma}} = 0.0385$ ] | 4948<br>[ $R_{\text{int}} = 0.0260$ , $R_{\text{sigma}} = 0.0234$ ] |
| Data/Restraints/Parameters                            | 8019/24/559                                                         | 4948/0/325                                                          |
| Goodness-of-Fit on $F^2$                              | 0.975                                                               | 1.096                                                               |
| Final $R$ Indexes [ $I > 2\sigma(I)$ ]                | $R_I = 0.0390$ , $wR_2 = 0.1010$                                    | $R_I = 0.0414$ , $wR_2 = 0.1276$                                    |
| Final $R$ Indexes [All Data]                          | $R_I = 0.0425$ , $wR_2 = 0.1021$                                    | $R_I = 0.0451$ , $wR_2 = 0.1294$                                    |
| Largest Diff. Peak/Hole [ $e \cdot \text{\AA}^{-3}$ ] | 0.96/-1.00                                                          | 2.21/-1.54                                                          |
| Flack Parameter                                       | -                                                                   | -                                                                   |

|                          | Crystal Data for <b>2-Br</b>                                       | Crystal Data for <b>3a</b> *CH <sub>2</sub> Cl <sub>2</sub>                                   |
|--------------------------|--------------------------------------------------------------------|-----------------------------------------------------------------------------------------------|
| Empirical Formula        | C <sub>20</sub> H <sub>20</sub> BrCuMn <sub>4</sub> P <sub>4</sub> | C <sub>28</sub> H <sub>27</sub> Cl <sub>2</sub> Mn <sub>5</sub> O <sub>2</sub> P <sub>4</sub> |
| Formula Weight           | 747.45                                                             | 864.98                                                                                        |
| Temperature [K]          | 123.0(2)                                                           | 123.10(10)                                                                                    |
| Crystal System           | monoclinic                                                         | monoclinic                                                                                    |
| Space Group              | <i>Cc</i>                                                          | <i>P2<sub>1</sub>/n</i>                                                                       |
| $a$ [Å]                  | 14.1032(6)                                                         | 11.9099(1)                                                                                    |
| $b$ [Å]                  | 12.6047(5)                                                         | 14.8210(1)                                                                                    |
| $c$ [Å]                  | 12.7139(4)                                                         | 17.9552(2)                                                                                    |
| $\alpha$ [°]             | 90                                                                 | 90                                                                                            |
| $\beta$ [°]              | 101.172(3)                                                         | 106.097(1)                                                                                    |
| $\gamma$ [°]             | 90                                                                 | 90                                                                                            |
| Volume [Å <sup>3</sup> ] | 2217.28(15)                                                        | 3045.13(5)                                                                                    |
| $Z$                      | 4                                                                  | 4                                                                                             |

|                                              |                                                                   |                                                                   |
|----------------------------------------------|-------------------------------------------------------------------|-------------------------------------------------------------------|
| $\rho_{\text{calc}}$ [mg/mm <sup>3</sup> ]   | 2.239                                                             | 1.887                                                             |
| $\mu$ [mm <sup>-1</sup> ]                    | 23.994                                                            | 20.248                                                            |
| F(000)                                       | 1456.0                                                            | 1720.0                                                            |
| Crystal Size [mm <sup>3</sup> ]              | 0.078 × 0.0436 × 0.0287                                           | 0.1889 × 0.1035 × 0.1005                                          |
| Radiation                                    | Cu-K $\alpha$ ( $\lambda$ = 1.54178)                              | Cu-K $\alpha$ ( $\lambda$ = 1.54178)                              |
| 2 $\theta$ Range                             | 9.5 to 132.96°                                                    | 7.86 to 133.1258°                                                 |
| Index Ranges                                 | -16 ≤ h ≤ 16<br>-10 ≤ k ≤ 14<br>-14 ≤ l ≤ 15                      | -13 ≤ h ≤ 13<br>-17 ≤ k ≤ 16<br>-21 ≤ l ≤ 14                      |
| Reflections Collected                        | 3838                                                              | 13200                                                             |
| Independent Reflections                      | 2437<br>[ $R_{\text{int}}$ = 0.0229, $R_{\text{sigma}}$ = 0.0264] | 5258<br>[ $R_{\text{int}}$ = 0.0311, $R_{\text{sigma}}$ = 0.0419] |
| Data/Restraints/Parameters                   | 2437/8/280                                                        | 5258/0/370                                                        |
| Goodness-of-Fit on $F^2$                     | 1.071                                                             | 0.867                                                             |
| Final $R$ Indexes [ $I > 2\sigma(I)$ ]       | $R_I$ = 0.0402, $wR_2$ = 0.1244                                   | $R_I$ = 0.0255, $wR_2$ = 0.0561                                   |
| Final $R$ Indexes [All Data]                 | $R_I$ = 0.0409, $wR_2$ = 0.1248                                   | $R_I$ = 0.0329, $wR_2$ = 0.0572                                   |
| Largest Diff. Peak/Hole [e·Å <sup>-3</sup> ] | 1.35/-1.12                                                        | 0.48/-0.30                                                        |
| Flack Parameter                              | 0.013(7)                                                          | -                                                                 |

|                   | Crystal Data for <b>3b</b> *2CH <sub>2</sub> Cl <sub>2</sub>                                  | Crystal Data for <b>3c</b> *3CH <sub>2</sub> Cl <sub>2</sub>                                    |
|-------------------|-----------------------------------------------------------------------------------------------|-------------------------------------------------------------------------------------------------|
| Empirical Formula | C <sub>36</sub> H <sub>34</sub> Cl <sub>4</sub> Mn <sub>6</sub> O <sub>4</sub> P <sub>4</sub> | C <sub>85</sub> H <sub>76</sub> Cl <sub>6</sub> Mn <sub>14</sub> O <sub>12</sub> P <sub>8</sub> |
| Formula Weight    | 1125.95                                                                                       | 2519.08                                                                                         |
| Temperature [K]   | 123.00(10)                                                                                    | 123.00(10)                                                                                      |
| Crystal System    | triclinic                                                                                     | triclinic                                                                                       |
| Space Group       | $P\bar{1}$                                                                                    | $P\bar{1}$                                                                                      |
| $a$ [Å]           | 10.5319(4)                                                                                    | 10.3548(2)                                                                                      |
| $b$ [Å]           | 10.8158(6)                                                                                    | 10.5563(1)                                                                                      |
| $c$ [Å]           | 18.0191(8)                                                                                    | 20.4728(3)                                                                                      |

|                                              |                                                                   |                                                                   |
|----------------------------------------------|-------------------------------------------------------------------|-------------------------------------------------------------------|
| $\alpha$ [°]                                 | 77.832(4)                                                         | 79.072(1)                                                         |
| $\beta$ [°]                                  | 80.265(4)                                                         | 82.668(1)                                                         |
| $\gamma$ [°]                                 | 85.858(4)                                                         | 83.529(1)                                                         |
| Volume [Å <sup>3</sup> ]                     | 1976.14(16)                                                       | 2170.28(6)                                                        |
| Z                                            | 2                                                                 | 1                                                                 |
| $\rho_{\text{calc}}$ [mg/mm <sup>3</sup> ]   | 1.892                                                             | 1.927                                                             |
| $\mu$ [mm <sup>-1</sup> ]                    | 19.488                                                            | 19.547                                                            |
| F(000)                                       | 1120.0                                                            | 1254.0                                                            |
| Crystal Size [mm <sup>3</sup> ]              | 0.1852 × 0.1225 × 0.0656                                          | 0.3779 × 0.0484 × 0.0379                                          |
| Radiation                                    | Cu-K $\alpha$ ( $\lambda$ = 1.54178)                              | Cu-K $\alpha$ ( $\lambda$ = 1.54178)                              |
| 2 $\theta$ Range                             | 8.36 to 147.0416°                                                 | 8.56 to 147.0034°                                                 |
| Index Ranges                                 | -10 ≤ h ≤ 13<br>-12 ≤ k ≤ 13<br>-19 ≤ l ≤ 22                      | -12 ≤ h ≤ 12<br>-11 ≤ k ≤ 12<br>-25 ≤ l ≤ 25                      |
| Reflections Collected                        | 14154                                                             | 26928                                                             |
| Independent Reflections                      | 7594<br>[ $R_{\text{int}}$ = 0.0351, $R_{\text{sigma}}$ = 0.0436] | 8389<br>[ $R_{\text{int}}$ = 0.0413, $R_{\text{sigma}}$ = 0.0290] |
| Data/Restraints/Parameters                   | 7594/132/706                                                      | 8389/0/568                                                        |
| Goodness-of-Fit on $F^2$                     | 0.948                                                             | 1.077                                                             |
| Final $R$ Indexes [ $I > 2\sigma(I)$ ]       | $R_I$ = 0.0364, $wR_2$ = 0.0886                                   | $R_I$ = 0.0363, $wR_2$ = 0.1004                                   |
| Final $R$ Indexes [All Data]                 | $R_I$ = 0.0448, $wR_2$ = 0.0907                                   | $R_I$ = 0.0398, $wR_2$ = 0.1019                                   |
| Largest Diff. Peak/Hole [e·Å <sup>-3</sup> ] | 0.97/-0.62                                                        | 0.90/-1.02                                                        |
| Flack Parameter                              | -                                                                 | -                                                                 |

Crystal Data for **3d**\*2CH<sub>2</sub>Cl<sub>2</sub>

|                   |                                                                                               |
|-------------------|-----------------------------------------------------------------------------------------------|
| Empirical Formula | C <sub>50</sub> H <sub>44</sub> Cl <sub>4</sub> Mn <sub>8</sub> O <sub>8</sub> P <sub>4</sub> |
| Formula Weight    | 1478.05                                                                                       |
| Temperature [K]   | 123.00(10)                                                                                    |



|                                                              |                                                                     |
|--------------------------------------------------------------|---------------------------------------------------------------------|
| Crystal System                                               | monoclinic                                                          |
| Space Group                                                  | <i>C2/c</i>                                                         |
| <i>a</i> [Å]                                                 | 29.4777(8)                                                          |
| <i>b</i> [Å]                                                 | 11.0635(3)                                                          |
| <i>c</i> [Å]                                                 | 21.2608(6)                                                          |
| $\alpha$ [°]                                                 | 90                                                                  |
| $\beta$ [°]                                                  | 132.060(4)                                                          |
| $\gamma$ [°]                                                 | 90                                                                  |
| Volume [Å <sup>3</sup> ]                                     | 5147.9(4)                                                           |
| <i>Z</i>                                                     | 4                                                                   |
| $\rho_{\text{calc}}$ [mg/mm <sup>3</sup> ]                   | 1.907                                                               |
| $\mu$ [mm <sup>-1</sup> ]                                    | 18.978                                                              |
| F(000)                                                       | 2944.0                                                              |
| Crystal Size [mm <sup>3</sup> ]                              | 0.067 × 0.0411 × 0.0365                                             |
| Radiation                                                    | Cu-K $\alpha$ ( $\lambda = 1.54178$ )                               |
| 2 $\theta$ Range                                             | 8.08 to 147.1652°                                                   |
| Index Ranges                                                 | -36 ≤ <i>h</i> ≤ 35<br>-12 ≤ <i>k</i> ≤ 13<br>-23 ≤ <i>l</i> ≤ 26   |
| Reflections Collected                                        | 13730                                                               |
| Independent Reflections                                      | 4948<br>[ $R_{\text{int}} = 0.0269$ , $R_{\text{sigma}} = 0.0312$ ] |
| Data/Restraints/Parameters                                   | 4948/0/334                                                          |
| Goodness-of-Fit on $F^2$                                     | 0.988                                                               |
| Final <i>R</i> Indexes [ <i>I</i> > 2 $\sigma$ ( <i>I</i> )] | $R_1 = 0.0267$ , $wR_2 = 0.0652$                                    |
| Final <i>R</i> Indexes [All Data]                            | $R_1 = 0.0343$ , $wR_2 = 0.0667$                                    |
| Largest Diff. Peak/Hole [e·Å <sup>-3</sup> ]                 | 1.17/-1.07                                                          |
| Flack Parameter                                              | -                                                                   |

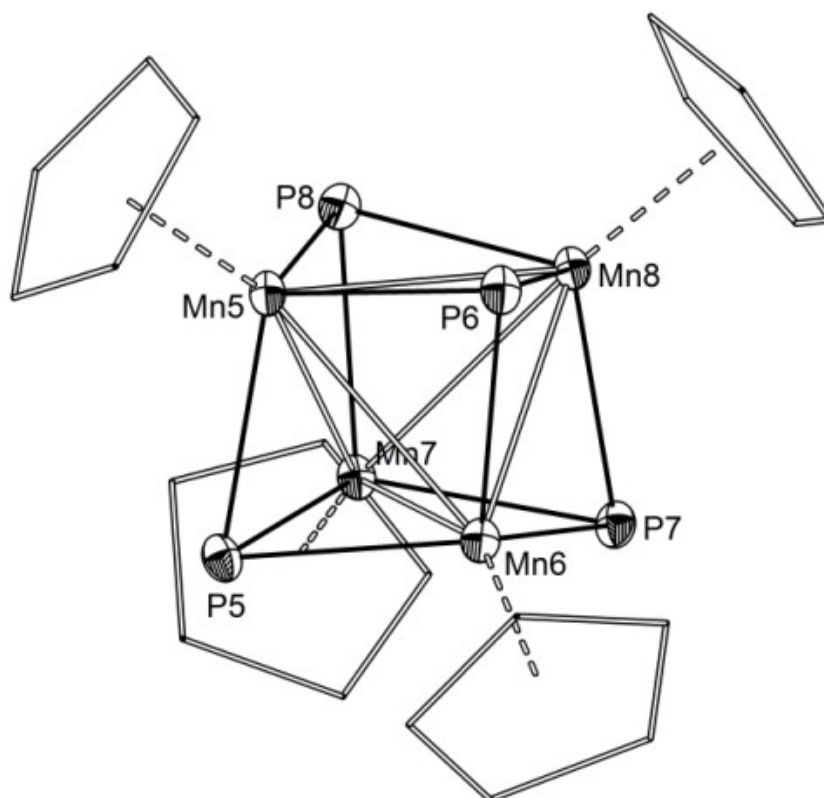

**Figure S16.** Molecular structure of **1** in the crystal. For clarity only one molecule of the asymmetric unit is depicted, C atoms are shown in ‘wire-or-stick’ model and H atoms and solvent molecules are omitted. Ellipsoids are drawn at 50% probability level. Selected bond lengths [Å] and angles [°]: Mn1-P1 2.2381(8), Mn1-P2 2.2251(9), Mn1-P3 2.2628(10), Mn2-P1 2.2365(9), Mn2-P2 2.2284(9), Mn2-P4 2.2374(10), Mn3-P1 2.2411(10), Mn3-P3 2.2353(9), Mn3-P4 2.2249(9), Mn4-P2 2.2398(10), Mn4-P3 2.2337(9), Mn4-P4 2.2299(9), Mn5-P5 2.2373(9), Mn5-P6 2.2392(8), Mn5-P8 2.2336(10), Mn6-P5 2.2311(8), Mn6-P6 2.2299(9), Mn6-P7 2.2352(10), Mn7-P5 2.2377(10), Mn7-P7 2.2367(9), Mn7-P8 2.2395(9), Mn8-P6 2.2336(10), Mn8-P7 2.2285(9), Mn8-P8 2.2343(9), Mn1-Mn2 2.7320(6), Mn1-Mn3 2.6992(5), Mn1-Mn4 2.6948(8), Mn2-Mn3 2.6997(6), Mn2-Mn4 2.6914(8), Mn3-Mn4 2.7227(7), Mn5-Mn6 2.7095(6), Mn5-Mn7 2.7282(7), Mn5-Mn8 2.7170(5), Mn6-Mn7 2.7182(8), Mn6-Mn8 2.7150(6), Mn7-Mn8 2.7273(8), av. Mn-P 2.235, av. Mn-Mn 2.713.

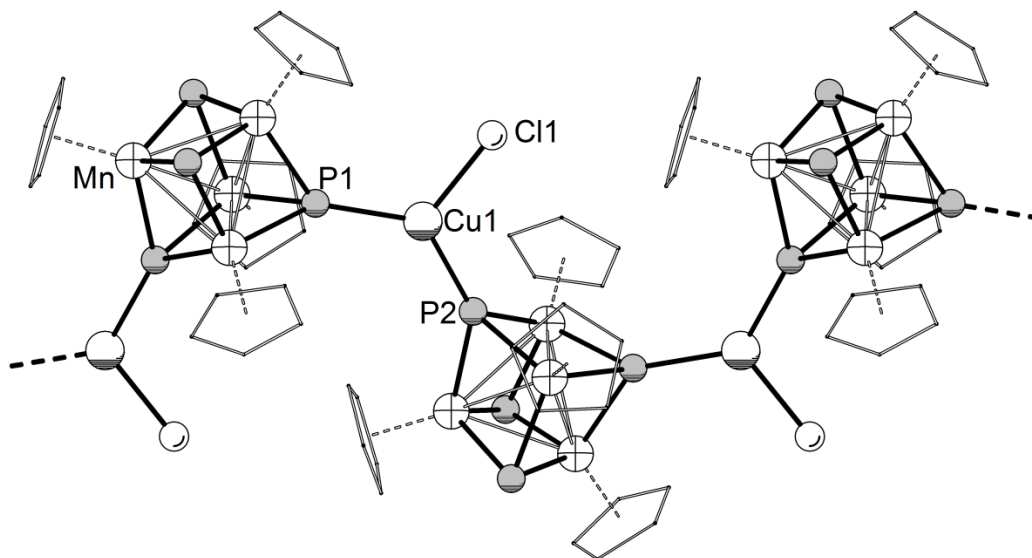

**Figure S17:** Section of the 1D zigzag chain  $[\{(CpMn)_4(\mu^3-P)_4\}(CuCl)]_n$  (**2-Cl**) in the crystal. View along crystallographic *c*-axis. For clarity reasons the C atoms are shown in ‘wire-or-stick’ model and H atoms and solvent molecules are omitted. Because of the isostructural constitution of **2-Br**, its structure is not depicted. Selected bond lengths [Å] and angles [°] of **2-Cl**: P1-Cu1 2.248(1), P2-Cu1 2.252(1), Cu1-Cl1 2.245(2), P1-Cu1-P2 129.64(5), P1-Cu1-Cl1 117.26(5), P2-Cu1-Cl1 112.85(5), av. Mn-P 2.228, av. Mn-Mn 2.720. Selected bond lengths [Å] and angles [°] of **2-Br** (for labeling see Supporting Information): P1-Cu1 2.248(3), P4-Cu1 2.252(3), Cu1-Br1 2.372(8), Cu1-Br2 2.324(5), P1-Cu1-P4 129.0(1), P1-Cu1-Br1 119.8(2), P1-Cu1-Br2 115.1(1), P4-Cu1-Br1 108.0(2), P4-Cu1-Br2 115.9(1), av. Mn-P 2.231, av. Mn-Mn 2.718.

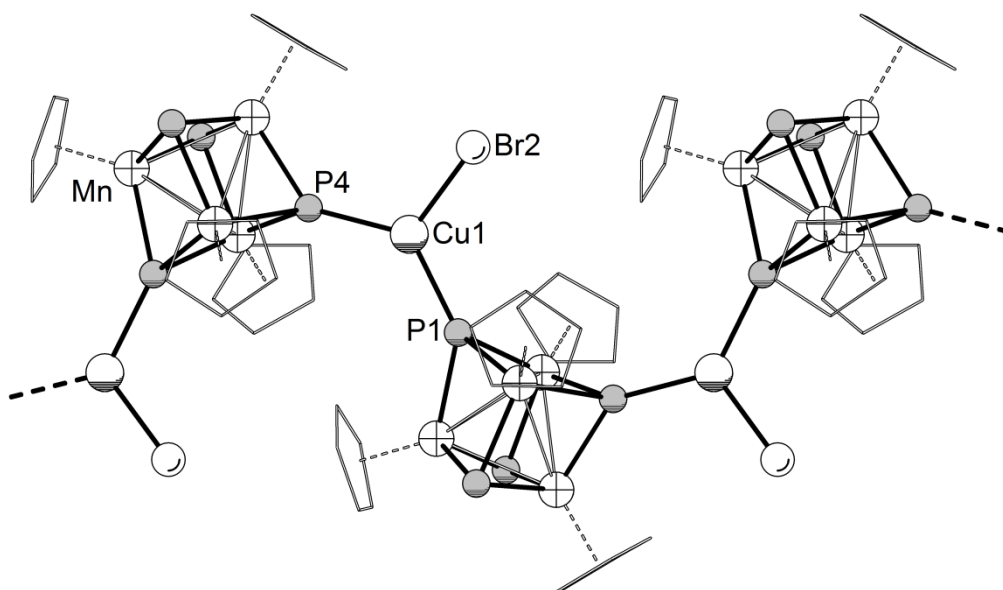

**Figure S18:** Section of 1D zigzag chain  $[\{(\text{CpMn})_4(\mu_3\text{-P})_4\}(\text{CuBr})]_n$  (**2-Br**) in the crystal. View along crystallographic *a*-axis. For clarity reasons the C atoms are shown in ‘wire-or-stick’ model and H atoms and solvent molecules are omitted. Br atom is disordered over two positions with occupancies of 0.57 and 0.43, only main part is shown. Selected bond lengths [Å] and angles [°]: P1-Cu1 2.248(3), P4-Cu1 2.252(3), Cu1-Br1 2.372(8), Cu1-Br2 2.324(5), P1-Cu1-P4 129.0(1), P1-Cu1-Br1 119.8(2), P1-Cu1-Br2 115.1(1), P4-Cu1-Br1 108.0(2), P4-Cu1-Br2 115.9(1), av. Mn-P 2.231, av. Mn-Mn 2.718.

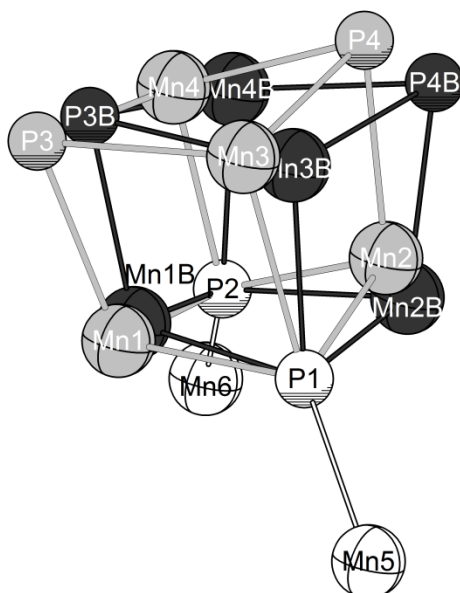

**Figure S19:** Disordered core of compound **3b**. Cp and CO ligands as well as Mn–Mn bonds are omitted for clarity. Parts 1 and 2 are colored differently. White colored atoms belong to both parts and therefore are not disordered.

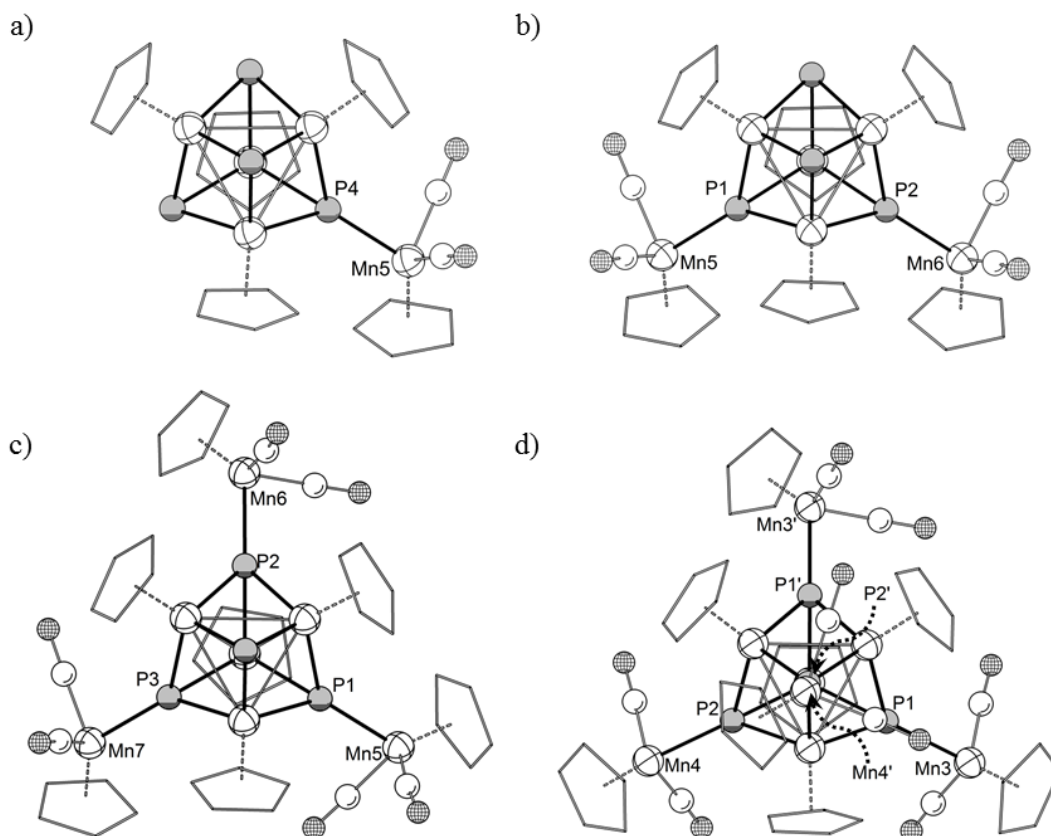

**Figure S20:** Molecular structures in the crystals: a) **3a**, b) **3b**, c) **3c**, d) **3d**. For clarity the Cp carbon atoms are shown in ‘wireframe’ model and H atoms and solvent molecules are omitted. In case of the disordered molecule **3b** only the main part is depicted. Selected Mn–P bond lengths [Å] in **3a**: Mn5–P4 2.2603(8), av. Mn–P 2.234, av. Mn–Mn 2.719; in **3b**: Mn5–P1 2.2576(10), Mn6–P2 2.2672(8), av. Mn–P 2.246, av. Mn–Mn 2.740; in **3c**: Mn5–P1 2.2779(8), Mn6–P2 2.2778(7), Mn7–P3 2.2616(9) av. Mn–P 2.245, av. Mn–Mn 2.748; in **3d**: Mn3–P1 2.2928(7), Mn4–P2 2.2818(11), av. Mn–P 2.258, av. Mn–Mn 2.757. Average values are calculated only from the heterocubane cores.

#### 4) DFT Calculations:

All calculations were carried out using the TURBOMOLE program package.<sup>[6]</sup> The geometries were optimized using the RI-<sup>[7]</sup>BP86<sup>[8]</sup> functional together with the def2-TZVP<sup>[9]</sup> basis set for all atoms. The Multipole Accelerated Resolution of Identity (MARI-J)<sup>[10]</sup> approximation was used in the geometry optimizations. The final energy of the molecules has been determined by single point calculations without using the RI formalism. The relative energies were calculated by using the SCF energies.

**Table S1:** Relative energies of [(CpMn)<sub>4</sub>(P)<sub>4</sub>] (**1**) in different spin states. Calculated at the BP86/def2-TZVP level of theory.

| Multiplicity                        | 1 | 3     | 5      | 7      | 9      | 11   | 13   |
|-------------------------------------|---|-------|--------|--------|--------|------|------|
| Rel. Energy (kJ mol <sup>-1</sup> ) | 0 | 70.27 | 127.92 | 163.67 | 214.09 | n.c. | n.c. |

n.c. = SCF not converged

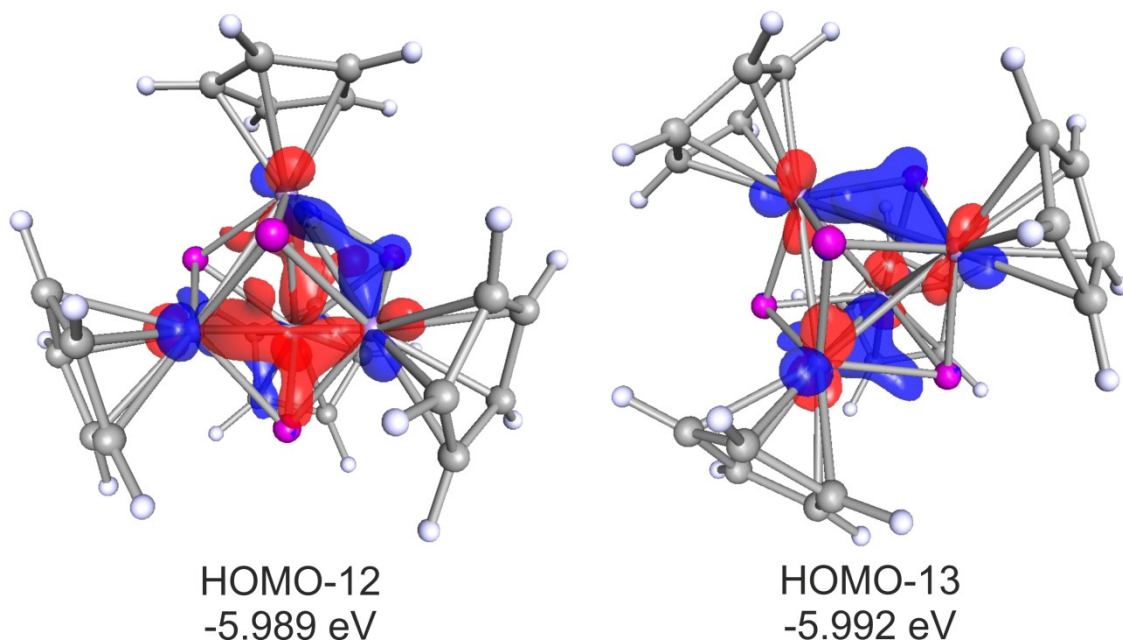

**Figure S21:** Selected molecular orbitals representing the Mn–P bonding in [(CpMn)<sub>4</sub>(P)<sub>4</sub>] (**1**) in singlet spin state. Calculated at the BP86/def2-TZVP level of theory.

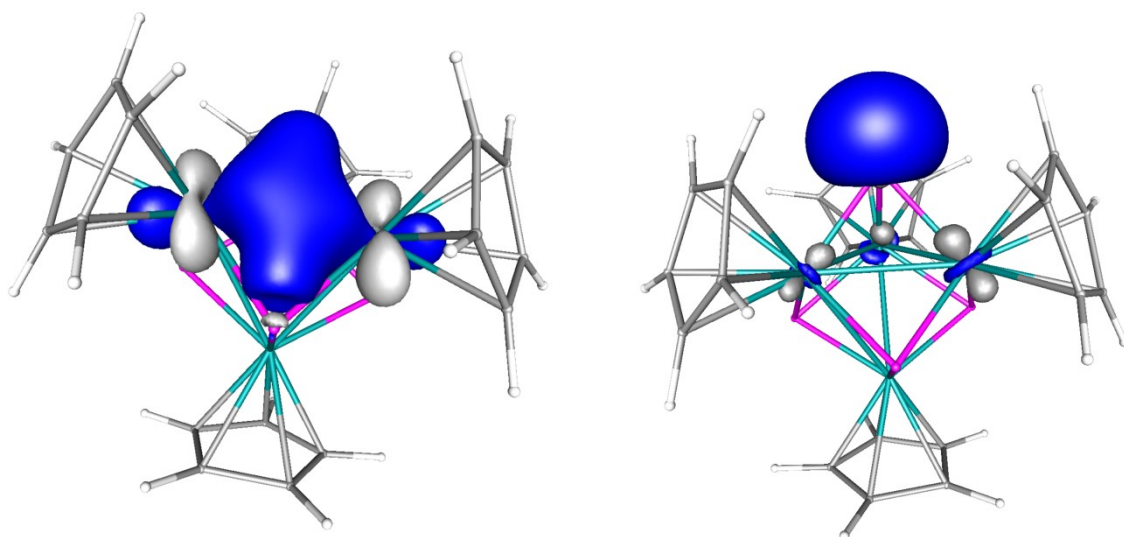

**Figure S22:** Selected localized molecular orbitals representing the Mn–P bonding (left) and the lone pair of the phosphorus atoms (right) in  $[(\text{CpMn})_4(\text{P})_4]$  (**1**) in singlet spin state. Calculated at the BP86/def2-TZVP level of theory.

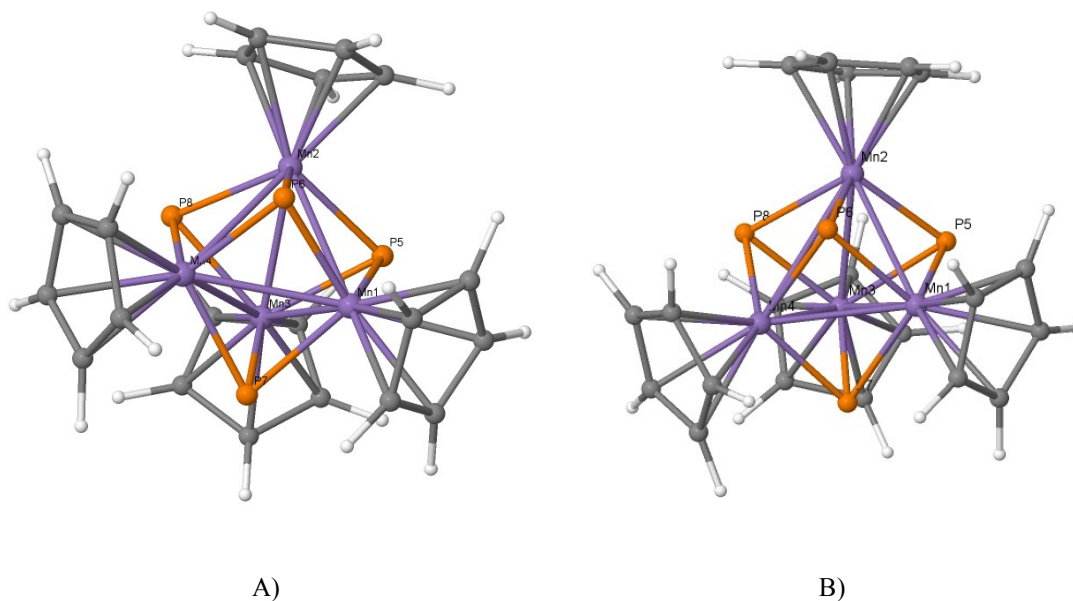

**Figure S3:** Optimized geometry of  $[(\text{CpMn})_4(\text{P})_4]$  (**1**) **A)** in singlet spin state **B)** in the triplet spin state. Selected bond lengths (Å): **A)** P8–Mn2 2.226, Mn2–P6 2.220, Mn2–P6 2.220, Mn2–P5 2.220, P5–Mn1 2.226, P5–Mn3 2.219, Mn2–Mn1 2.705, P6–Mn1 2.222, Mn1–P7 2.218, Mn1–Mn3 2.705, Mn1–Mn4 2.705, Mn3–Mn4 2.706, P7–Mn4 2.223, P7–Mn3 2.225, Mn3–Mn2 2.705, P6–Mn4 2.225, Mn2–Mn4 2.705, Mn4–P8 2.218, P8–Mn3 2.222. **B)** Mn2–P8 2.254, Mn2–P6 2.254, Mn2–P5 2.206, Mn2–Mn4 3.189, Mn2–Mn3 2.717, Mn2–Mn1 2.717, P5–Mn1 2.238, P5–Mn3 2.238, Mn1–P6 2.240, Mn1–P7 2.238, Mn1–Mn4 2.716, Mn1–Mn3 2.702, Mn2–P6 2.254, P7–Mn3 2.238, P7–Mn4 2.206, Mn3–P8 2.240, Mn4–P8 2.255, Mn3–Mn4 2.717, P6–Mn4 2.254.

**Table S2:** Cartesian coordinates of the optimized geometry of  $[(\text{CpMn})_4(\text{P})_4]$  (**1**; singlet) at the BP86/def2-SVP level of theory.

| Atom | x         | z          | y          | Atom | x        | z        | y        |
|------|-----------|------------|------------|------|----------|----------|----------|
| Mn   | 5.5725756 | -3.0634705 | 16.7212452 | C    | 3.07046  | -1.23439 | 19.78121 |
| Mn   | 4.4295672 | -0.780238  | 15.828574  | C    | 1.901976 | -0.96697 | 19.01673 |
| Mn   | 3.2767684 | -3.1683163 | 15.295251  | C    | 1.269736 | -2.21751 | 18.72319 |
| Mn   | 3.2587448 | -2.1899478 | 17.817917  | C    | 2.050283 | -3.25219 | 19.30629 |
| P    | 5.2565477 | -2.4400967 | 14.6078313 | H    | 8.273309 | -1.95713 | 16.58867 |
| P    | 5.2413819 | -1.1816545 | 17.8549663 | H    | 7.665807 | -3.90772 | 14.81939 |
| P    | 3.7592589 | -4.2584852 | 17.1741544 | H    | 6.303916 | -5.83436 | 16.14081 |
| P    | 2.2793741 | -1.3224908 | 16.0272746 | H    | 6.146716 | -5.11517 | 18.73696 |
| C    | 7.7470084 | -2.8801391 | 16.8106809 | H    | 7.381371 | -2.72568 | 19.01929 |
| C    | 7.4122899 | -3.9027522 | 15.874507  | H    | 6.588404 | 1.072342 | 16.56285 |
| C    | 6.7074606 | -4.9235299 | 16.5717124 | H    | 4.059358 | 1.78271  | 17.18297 |
| C    | 6.6204181 | -4.5396379 | 17.9480624 | H    | 2.503126 | 1.307666 | 15.0236  |
| C    | 7.2646951 | -3.2823474 | 18.0950039 | H    | 4.057655 | 0.209622 | 13.10423 |
| C    | 5.7262542 | 0.9805842  | 15.9099766 | H    | 6.588414 | 0.100508 | 14.03894 |
| C    | 4.3872114 | 1.3649001  | 16.2363589 | H    | 0.548504 | -4.19416 | 15.49668 |
| C    | 3.5651945 | 1.0999081  | 15.1035968 | H    | 1.009164 | -2.29246 | 13.63404 |
| C    | 4.3868254 | 0.5352782  | 14.0858768 | H    | 3.323527 | -2.903   | 12.37527 |
| C    | 5.7261218 | 0.4699881  | 14.5847377 | H    | 4.271524 | -5.19567 | 13.43602 |
| C    | 1.3922883 | -4.1618776 | 14.8146396 | H    | 2.530091 | -6.02344 | 15.33232 |
| C    | 1.6426191 | -3.1500011 | 13.8366192 | H    | 3.964267 | -3.17233 | 20.47732 |
| C    | 2.8554954 | -3.4731431 | 13.1714595 | H    | 3.758438 | -0.49521 | 20.17857 |
| C    | 3.3565688 | -4.6917494 | 13.7311885 | H    | 1.546295 | 0.010662 | 18.70727 |
| C    | 2.4466874 | -5.1196405 | 14.7374808 | H    | 0.353671 | -2.3456  | 18.15533 |
| C    | 3.1721966 | -2.6482725 | 19.9517225 | H    | 1.829074 | -4.3143  | 19.27877 |

**Table S3:** Cartesian coordinates of the optimized geometry of  $[(\text{CpMn})_4(\text{P})_4]$  (**1**; triplet) at the BP86/def2-SVP level of theory.

| Atom | x         | z          | y          | Atom | x         | z         | y         |
|------|-----------|------------|------------|------|-----------|-----------|-----------|
| Mn   | 5.5157269 | -3.0253051 | 16.8091735 | C    | 2.6371031 | -1.395784 | 19.804361 |
| Mn   | 4.6290623 | -0.7375794 | 15.6422317 | C    | 1.4622202 | -1.451054 | 19.003502 |
| Mn   | 3.2850243 | -3.0710769 | 15.2843875 | C    | 1.1352834 | -2.828424 | 18.797743 |
| Mn   | 3.1144965 | -2.3912554 | 17.9093481 | C    | 2.1013928 | -3.622035 | 19.479391 |
| P    | 5.3609971 | -2.5546379 | 14.6271973 | H    | 8.221419  | -2.144034 | 16.168051 |
| P    | 4.9693622 | -1.1122162 | 17.8389117 | H    | 7.4377784 | -4.51897  | 15.148126 |
| P    | 3.7244339 | -4.3403551 | 17.0746532 | H    | 6.1664419 | -5.88693  | 17.100366 |
| P    | 2.4699369 | -1.1639139 | 16.1310632 | H    | 6.1604838 | -4.354261 | 19.324663 |
| C    | 7.688959  | -2.9212022 | 16.7066911 | H    | 7.4817765 | -2.062344 | 18.767655 |
| C    | 7.2657471 | -4.1767718 | 16.1634721 | H    | 7.2479494 | 0.5993296 | 15.664201 |
| C    | 6.5971343 | -4.8947894 | 17.1886465 | H    | 5.2349254 | 1.7705852 | 17.033457 |
| C    | 6.6027146 | -4.0867333 | 18.3704189 | H    | 3.0243399 | 1.7107792 | 15.475774 |
| C    | 7.2898679 | -2.8742142 | 18.0733341 | H    | 3.679824  | 0.5034717 | 13.149146 |



|   |           |            |            |   |           |           |           |
|---|-----------|------------|------------|---|-----------|-----------|-----------|
| C | 6.2348005 | 0.7467601  | 15.3026008 | H | 6.3045822 | -0.12682  | 13.239383 |
| C | 5.1654026 | 1.3523838  | 16.0350373 | H | 0.765221  | -4.499854 | 15.629865 |
| C | 4.0025491 | 1.3208852  | 15.2155214 | H | 0.7012471 | -2.222958 | 14.172974 |
| C | 4.354388  | 0.6955719  | 13.9779611 | H | 2.8444657 | -2.23456  | 12.524838 |
| C | 5.7349226 | 0.3505554  | 14.029896  | H | 4.1759716 | -4.554792 | 12.897694 |
| C | 1.4765993 | -4.2106578 | 14.8631472 | H | 2.890335  | -5.955322 | 14.817297 |
| C | 1.4493911 | -3.0060621 | 14.1027787 | H | 3.9077634 | -3.033255 | 20.667805 |
| C | 2.572732  | -3.0165659 | 13.2264806 | H | 3.1381329 | -0.496574 | 20.146576 |
| C | 3.2838163 | -4.2424378 | 13.43079   | H | 0.9048766 | -0.601365 | 18.624005 |
| C | 2.6085927 | -4.9779438 | 14.4390396 | H | 0.3030187 | -3.202737 | 18.209424 |
| C | 3.0342743 | -2.7394491 | 20.0935529 | H | 2.121101  | -4.705952 | 19.524689 |

**Table S4:** Cartesian coordinates of the optimized geometry of  $[(\text{CpMn})_4(\text{P})_4]$  (**1**; quintet) at the BP86/def2-SVP level of theory.

| Atom | x         | z          | y          | Atom | x          | z          | y          |
|------|-----------|------------|------------|------|------------|------------|------------|
| Mn   | 5.7403328 | -3.0005743 | 16.6385054 | C    | 2.5867844  | -1.5294436 | 19.9850084 |
| Mn   | 4.5859699 | -0.7715821 | 15.6566187 | C    | 1.5111141  | -1.0356547 | 19.1867783 |
| Mn   | 3.3523784 | -3.1741039 | 15.353298  | C    | 0.739567   | -2.1560303 | 18.754885  |
| Mn   | 2.9004949 | -2.2698718 | 17.9255581 | C    | 1.3396494  | -3.3323808 | 19.2690535 |
| P    | 5.3410689 | -2.513508  | 14.5144913 | H    | 8.3905361  | -1.7390826 | 16.4169772 |
| P    | 4.9636355 | -1.2527083 | 17.8209838 | H    | 7.9416687  | -3.8585699 | 14.8046727 |
| P    | 3.9169676 | -4.1706045 | 17.2851866 | H    | 6.6838986  | -5.754322  | 16.2606482 |
| P    | 2.3997669 | -1.2426354 | 15.9891152 | H    | 6.4540538  | -4.8522473 | 18.7970171 |
| C    | 7.9253858 | -2.6749156 | 16.7100631 | H    | 7.5096662  | -2.3644581 | 18.8945906 |
| C    | 7.6797382 | -3.7905877 | 15.8553527 | H    | 7.222645   | 0.520436   | 15.4726204 |
| C    | 7.0352308 | -4.7944454 | 16.6266916 | H    | 5.4120121  | 1.6150137  | 17.1538293 |
| C    | 6.8937829 | -4.3093069 | 17.967207  | H    | 3.034971   | 1.708532   | 15.8674639 |
| C    | 7.4502886 | -3.0016838 | 18.0185331 | H    | 3.3842289  | 0.6688642  | 13.3980417 |
| C    | 6.1770969 | 0.7063007  | 15.2484478 | H    | 5.9865764  | -0.0013484 | 13.1284542 |
| C    | 5.2167401 | 1.2758045  | 16.1420783 | H    | 0.7034084  | -4.3150159 | 15.7486653 |
| C    | 3.9663645 | 1.3232674  | 15.4664864 | H    | 0.9497907  | -2.4289564 | 13.8298699 |
| C    | 4.1577062 | 0.7914971  | 14.1500629 | H    | 3.2038933  | -2.9532632 | 12.4329868 |
| C    | 5.5224988 | 0.4211039  | 14.0135019 | H    | 4.3225678  | -5.1880628 | 13.4589765 |
| C    | 1.4969344 | -4.2570219 | 15.0108279 | H    | 2.756977   | -6.0517244 | 15.4868409 |
| C    | 1.6339913 | -3.2536448 | 14.002895  | H    | 3.1581095  | -3.6284162 | 20.5494962 |
| C    | 2.8161707 | -3.5316448 | 13.2655087 | H    | 3.3458061  | -0.9281791 | 20.4746162 |
| C    | 3.40908   | -4.7181097 | 13.8092662 | H    | 1.3040661  | 0.0056531  | 18.9609868 |
| C    | 2.5892687 | -5.1679541 | 14.8794384 | H    | -0.1337362 | -2.1104894 | 18.1106452 |
| C    | 2.4895458 | -2.9532558 | 20.0248108 | H    | 1.0099471  | -4.3515684 | 19.0894866 |

**Table S5:** Cartesian coordinates of the optimized geometry of  $[(\text{CpMn})_4(\text{P})_4]$  (**1**; septet) at the BP86/def2-SVP level of theory.

| Atom | x         | z          | y          | Atom | x         | z          | y          |
|------|-----------|------------|------------|------|-----------|------------|------------|
| Mn   | 5.7553035 | -3.2130165 | 16.7876934 | C    | 2.6729504 | -1.5049534 | 19.9393966 |
| Mn   | 4.4017806 | -0.5935081 | 15.6338052 | C    | 1.5810929 | -1.0134058 | 19.1627546 |
| Mn   | 3.403398  | -3.1782646 | 15.2826075 | C    | 0.7840769 | -2.1326567 | 18.7723004 |

|    |           |            |            |   |           |            |            |
|----|-----------|------------|------------|---|-----------|------------|------------|
| Mn | 2.914955  | -2.2873878 | 17.8766625 | C | 1.3866983 | -3.3061161 | 19.2871445 |
| P  | 5.4306488 | -2.378698  | 14.7183527 | H | 8.5137625 | -2.3377435 | 16.1255933 |
| P  | 4.9750405 | -1.2800627 | 17.7450771 | H | 7.7885509 | -4.7317523 | 15.1157365 |
| P  | 3.8041297 | -4.2521186 | 17.2224667 | H | 6.5601923 | -6.129596  | 17.0692072 |
| P  | 2.2935184 | -1.3287525 | 15.9338926 | H | 6.5183554 | -4.6028    | 19.2934518 |
| C  | 7.9979606 | -3.1254254 | 16.6654403 | H | 7.7373628 | -2.2561588 | 18.7174893 |
| C  | 7.6313785 | -4.4018625 | 16.1382912 | H | 6.9799204 | 0.6487621  | 14.8445545 |
| C  | 6.987068  | -5.1356428 | 17.1637887 | H | 5.7022731 | 1.6339352  | 17.0176628 |
| C  | 6.9459161 | -4.3211156 | 18.3364029 | H | 3.0954324 | 1.9646396  | 16.3695672 |
| C  | 7.5884374 | -3.0834328 | 18.0314008 | H | 2.7739167 | 1.2014317  | 13.8014946 |
| C  | 5.9246483 | 0.8935912  | 14.9113504 | H | 5.1691    | 0.3899674  | 12.8617069 |
| C  | 5.2502446 | 1.4129494  | 16.0563931 | H | 0.7684698 | -4.4306239 | 15.3877916 |
| C  | 3.8753093 | 1.5880227  | 15.7154285 | H | 1.1108377 | -2.4487835 | 13.5838834 |
| C  | 3.7112971 | 1.2031411  | 14.3495797 | H | 3.501937  | -2.8235335 | 12.3787797 |
| C  | 4.9681687 | 0.7762582  | 13.856503  | H | 4.6095721 | -5.0643368 | 13.399781  |
| C  | 1.6202983 | -4.311209  | 14.7259005 | H | 2.9021974 | -6.0805798 | 15.2330305 |
| C  | 1.808856  | -3.2559032 | 13.7825504 | H | 3.2406886 | -3.6000726 | 20.5179359 |
| C  | 3.0621525 | -3.4574151 | 13.1421822 | H | 3.4501812 | -0.9038765 | 20.3996621 |
| C  | 3.649     | -4.6457273 | 13.6827646 | H | 1.3790375 | 0.0263202  | 18.9258124 |
| C  | 2.7549862 | -5.1742198 | 14.6543568 | H | -0.107077 | -2.0884379 | 18.1532671 |
| C  | 2.5633764 | -2.9265588 | 20.0025441 | H | 1.0412385 | -4.3241706 | 19.1341013 |

**Table S6:** Cartesian coordinates of the optimized geometry of [(CpMn)<sub>4</sub>(P)<sub>4</sub>] (**1**; nonet) at the BP86/def2-SVP level of theory.

| Atom | x         | z          | y          | Atom | x          | z          | y          |
|------|-----------|------------|------------|------|------------|------------|------------|
| Mn   | 5.8004432 | -3.0323588 | 16.2536918 | C    | 2.0540377  | -0.898801  | 19.8474125 |
| Mn   | 4.8824877 | -0.525285  | 15.996755  | C    | 1.3279096  | -0.3511964 | 18.7576281 |
| Mn   | 3.3919833 | -3.8070325 | 15.3718385 | C    | 0.5445291  | -1.3988551 | 18.1761412 |
| Mn   | 2.7363979 | -1.9433513 | 17.8791211 | C    | 0.7830631  | -2.588644  | 18.9225037 |
| P    | 4.7121362 | -2.1988415 | 14.4887504 | H    | 8.3409934  | -1.6670871 | 15.812135  |
| P    | 5.0645228 | -1.6686014 | 17.9256618 | H    | 7.4816609  | -3.3537843 | 13.8803423 |
| P    | 4.0766289 | -3.8313151 | 17.5162959 | H    | 6.5579306  | -5.5945002 | 15.0795994 |
| P    | 2.7234509 | -1.5109147 | 15.603213  | H    | 6.8579634  | -5.2972345 | 17.7512656 |
| C    | 7.9225941 | -2.6557894 | 15.9699113 | H    | 7.9606995  | -2.8719846 | 18.2035199 |
| C    | 7.4573419 | -3.5418673 | 14.949191  | H    | 7.2713668  | 0.912841   | 17.0458645 |
| C    | 6.9800321 | -4.7307977 | 15.582924  | H    | 4.8572608  | 1.573297   | 18.0537441 |
| C    | 7.1383128 | -4.5743996 | 16.9920598 | H    | 3.1226311  | 1.7944579  | 15.9770588 |
| C    | 7.7216322 | -3.2907799 | 17.2314395 | H    | 4.4874666  | 1.2938034  | 13.6996625 |
| C    | 6.3702173 | 1.0903383  | 16.466679  | H    | 7.048025   | 0.7637951  | 14.3566026 |
| C    | 5.0880909 | 1.431524   | 17.0028216 | H    | 1.6360072  | -5.7648103 | 16.6785982 |
| C    | 4.1782271 | 1.5502276  | 15.9112834 | H    | 0.5108381  | -3.9715714 | 14.9779047 |
| C    | 4.9032602 | 1.2976217  | 14.7023521 | H    | 2.0294914  | -3.8829332 | 12.7444888 |
| C    | 6.2548575 | 1.0283485  | 15.0504342 | H    | 4.0797144  | -5.6034988 | 13.0555164 |
| C    | 2.0029154 | -5.490608  | 15.694844  | H    | 3.8521064  | -6.7474143 | 15.4937333 |
| C    | 1.4097582 | -4.5530559 | 14.7986574 | H    | 2.1417246  | -2.9871149 | 20.6609788 |
| C    | 2.205574  | -4.5155703 | 13.6089165 | H    | 2.7591111  | -0.3670409 | 20.4798206 |
| C    | 3.2807359 | -5.4301936 | 13.7711635 | H    | 1.3598623  | 0.6797343  | 18.4166162 |
| C    | 3.1725937 | -6.0192463 | 15.0611078 | H    | -0.1313125 | -1.2926697 | 17.3329821 |

---

|   |           |            |            |   |           |           |            |
|---|-----------|------------|------------|---|-----------|-----------|------------|
| C | 1.7307814 | -2.2851918 | 19.9411377 | H | 0.3405838 | -3.562548 | 18.7331704 |
|---|-----------|------------|------------|---|-----------|-----------|------------|

---

## 5) Calculation of Core Volumes:

**Table S7:** Volumes  $V$  of cluster cores of **1** and **3a-d**. The heterocubane scaffold is broken up into one  $Mn_4$  pyramid and four  $Mn_3P$  pyramids for the volume calculations (Heron's formula and  $V = 1/3*b*h$ ).  $\Delta V$  and the percentage increases are calculated compared to compound **1**.

|           |                   | $V [\text{\AA}^3]$ | $\Delta V [\text{\AA}^3]$ | percentage |
|-----------|-------------------|--------------------|---------------------------|------------|
| <b>1</b>  | unsubstituted     | 9.159              |                           |            |
| <b>3a</b> | mono-coordinated  | 9.151              | -0.008                    | -0.1%      |
| <b>3b</b> | di-coordinated    | 9.333              | 0.173                     | 1.9%       |
| <b>3c</b> | tri-coordinated   | 9.372              | 0.213                     | 2.3%       |
| <b>3d</b> | tetra-coordinated | 9.490              | 0.331                     | 3.5%       |

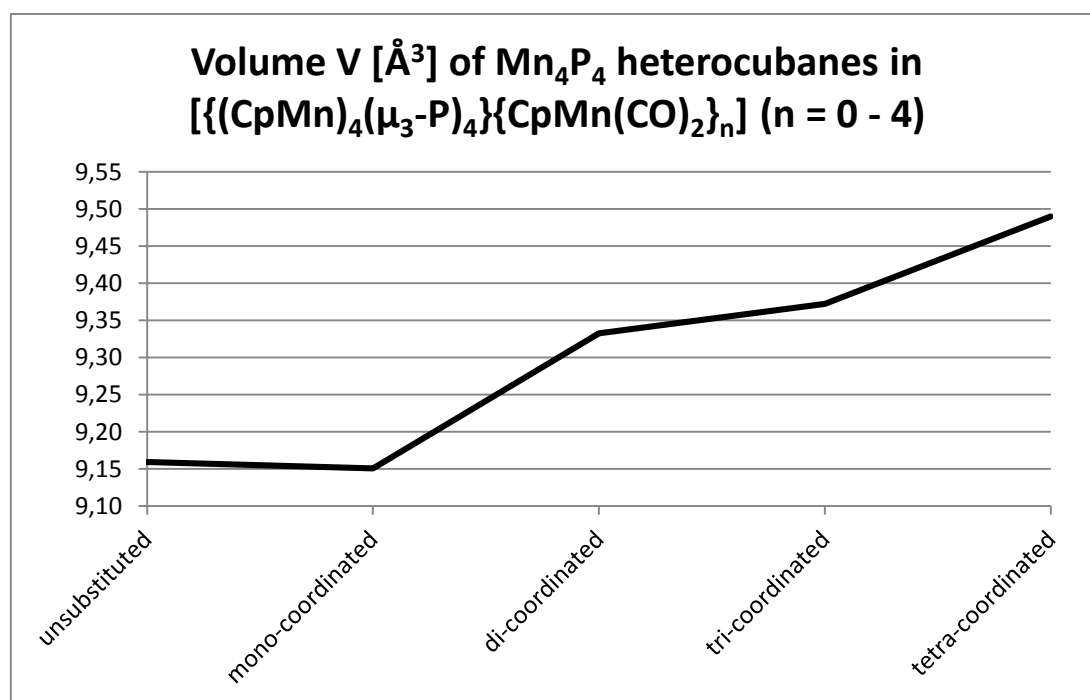

**Figure S23:** Graphical display of volumes  $V [\text{\AA}^3]$  of cluster cores of **1** and **3a-d**.

- 
- [1] a) P. L. Pauson, J. A. Segal, *J. Organomet. Chem.* 1973, **63**, C13-C14. b) P. L. Pauson, J. A. Segal, *J. Chem. Soc., Dalton Trans.* 1975, 2387-2392.
- [2] W. A. Herrmann, R. Serrano, J. Weichmann, *J. Organomet. Chem.* 1983, **246**, c57-c60.
- [3] R. C. Clark, J. S. Reid, *Acta Cryst.* 1995, **A51**, 887-897.
- [4] A. Altomare, M. C. Burla, M. Camalli, G.L. Cascarano, C. Giacovazzo, A. Guagliardi, A. G. G. Moliterni, G. Polidori, R. Spagna, *J. Appl. Cryst.* 1999, **32**, 115-119.
- [5] G. M. Sheldrick, *Acta Cryst.* 2008, **A64**, 112-122.
- [6] a) R. Ahlrichs, M. Bär, M. Häser, H. Horn, C. Kölmel, *Chem. Phys. Lett.* 1989, **162**, 165-169; b) O. Treutler, R. Ahlrichs, *J. Chem. Phys.* 1995, **102**, 346-354.
- [7] a) K. Eichkorn, O. Treutler, H. Oehm, M. Häser, R. Ahlrichs, *Chem. Phys. Lett.* 1995, **242**, 652-660; b) K. Eichkorn, F. Weigend, O. Treutler, R. Ahlrichs, *Theor. Chem. Acc.* 1997, **97**, 119.
- [8] a) P. A. M. Dirac, *Proc. Royal Soc. A*, 1929, **123**, 714-733. b) J. C. Slater, *Phys. Rev.* 1951, **81**, 385-390. c) S. H. Vosko, L. Wilk, M. Nusair, *Can. J. Phys.* 1980, **58**, 1200-1211. d) A. D. Becke, *Phys. Rev. A*, 1988, **38**, 3098. e) J. P. Perdew, *Phys. Rev. B* 1986, **33**, 8822-8824.
- [9] a) F. Weigend, M. Häser, H. Patzelt, R. Ahlrichs, *Chem. Phys. Letters* 1998, **294**, 143; b) F. Weigend, R. Ahlrichs, *Phys. Chem. Chem. Phys.* 2005, **7**, 3297; c) F. Weigend, *Phys. Chem. Chem. Phys.* 2006, **8**, 1057.
- [10] M. Sierka, A. Hogekamp, R. Ahlrichs, *J. Chem. Phys.* 2003, **118**, 9136.
